# Supplementary material for: Genome-Wide Identification of LBD Genes in Foxtail Millet (Setaria italica) and Functional Characterization of SiLBD21
Source: MDPI journal article supplement (doi:10.3390/ijms24087110), 2023-04-12
Supplement: s1 [file s1]

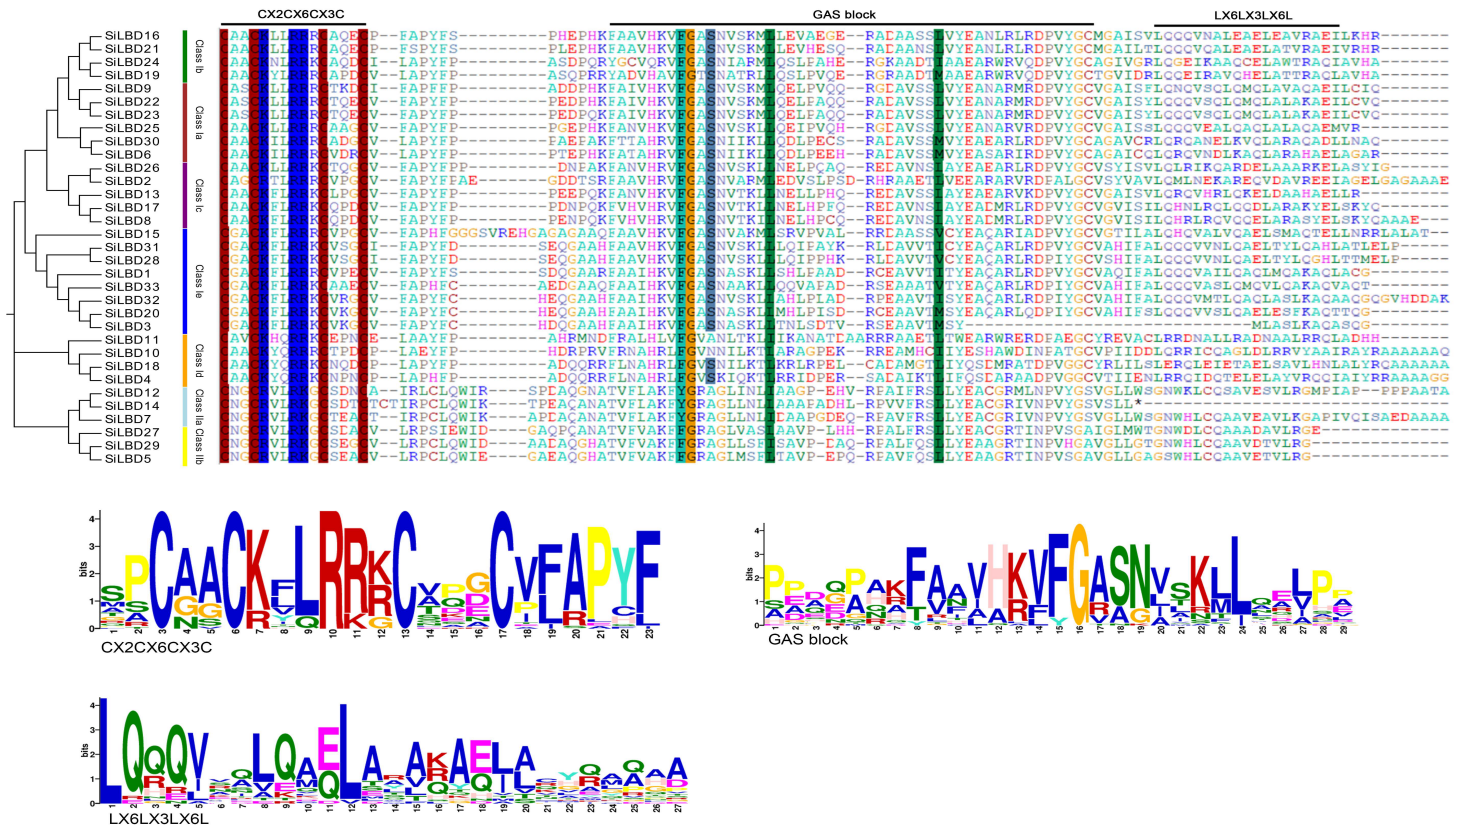

**Figure S1.** Comparison of protein sequence of SiLBDs conserved domains and CX2CX6CX3C motif, GAS motif LX6LX3LX6L motif of SiLBDs.
