# Supplementary material for: Genome-Wide Identification of LBD Genes in Foxtail Millet (Setaria italica) and Functional Characterization of SiLBD21
Source: MDPI journal article supplement (doi:10.3390/ijms24087110), 2023-04-12
Supplement: s1 [file s1]

(a)

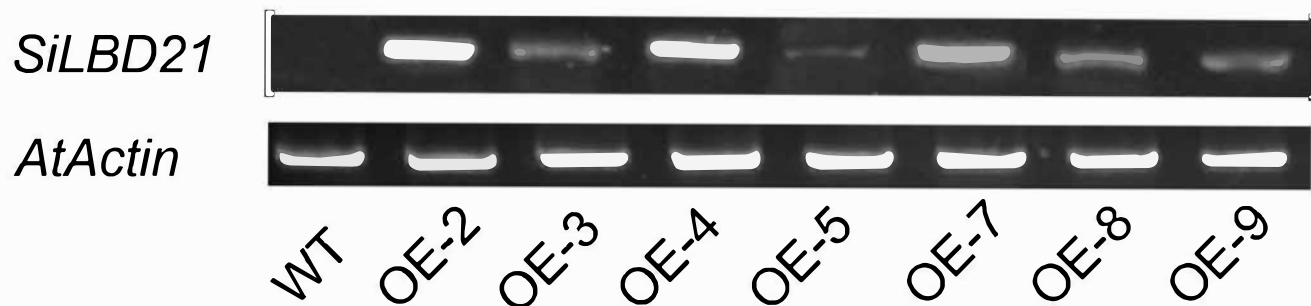

(b)

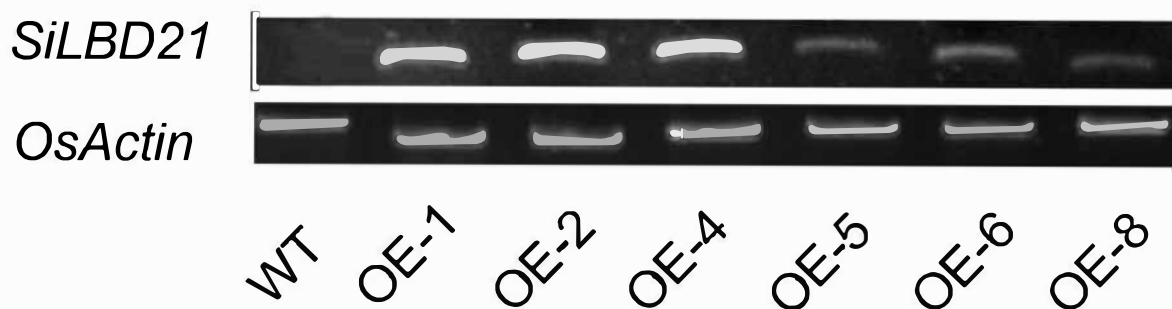

**Figure S2.** RT-PCR of positive *SiLBD21* transgenic *Arabidopsis* and rice lines. (a) 32 cycles of *AtActin*, 30 cycles of *SiLBD21*. (b) 30 cycles of *OsActin* and *SiLBD21*.
