# Supplementary material for: Genome-Wide Identification of LBD Genes in Foxtail Millet (Setaria italica) and Functional Characterization of SiLBD21
Source: Int J Mol Sci. 2023 Apr 12;24(8):7110. doi: 10.3390/ijms24087110 (PMC10138450; doi:10.3390/ijms24087110)
Supplement: Supplementary file 1 [file ijms-24-07110-s001.zip › SupplementaryTable.xlsx]

## Sheet: Table S1
Table S1 Physicochemical properties
Gene ID	Gene name	Subcellular localization	Number of amino acids	Molecular weight	Theoretical pI	Instability index	Aliphatic index	Grand average of hydropathicity	Chr.NO
Seita.1G369600	SiLBD1	Nucleus	215	22105.2	8.09	48.26	80.28	0.137	Chr1
Seita.2G038300	SiLBD2	Nucleus	681	72077.9	4.75	48.82	73.25	-0.399	Chr2
Seita.2G137700	SiLBD3	Nucleus	132	14435.4	7.59	43.62	62.95	-0.164	Chr2
Seita.2G186800	SiLBD4	Nucleus	363	38053.5	6.26	58.32	69.31	-0.347	Chr2
Seita.2G373900	SiLBD5	Nucleus	230	23398.8	8.66	66.39	77.7	0.089	Chr2
Seita.3G045800	SiLBD6	Nucleus	210	21796.7	6.21	48.4	88.1	0.105	Chr3
Seita.3G120000	SiLBD7	Nucleus	325	33677.5	6.52	57.94	71.14	-0.294	Chr3
Seita.3G240500	SiLBD8	Nucleus	278	27914.3	7.07	32.61	71.4	0.047	Chr3
Seita.3G280000	SiLBD9	Nucleus	202	21290.4	6.03	48.41	79.75	0	Chr3
Seita.4G047700	SiLBD10	Nucleus	306	33289.6	6.13	72.57	58.3	-0.515	Chr4
Seita.5G002200	SiLBD11	Nucleus	181	19478.1	9.68	60.14	64.97	-0.543	Chr5
Seita.5G088000	SiLBD12	Nucleus	297	31798	8.11	55.45	80.24	-0.289	Chr5
Seita.5G119400	SiLBD13	Nucleus	256	26252.8	7.6	58.62	72.58	-0.018	Chr5
Seita.5G271800	SiLBD14	Nucleus	91	9962.81	9.36	50.71	97.58	0.303	Chr5
Seita.5G334600	SiLBD15	Nucleus	230	23567.9	8.77	58.85	77	-0.019	Chr5
Seita.5G364600	SiLBD16	Nucleus	245	25789.1	6.24	51.52	81.02	-0.146	Chr5
Seita.5G408700	SiLBD17	Nucleus	261	26802.1	7.64	44.22	71.57	-0.07	Chr5
Seita.6G138500	SiLBD18	Nucleus	430	45651.2	4.73	52.68	73.7	-0.401	Chr6
Seita.6G214900	SiLBD19	Nucleus	192	20877.5	6.06	63.12	74.38	-0.417	Chr6
Seita.6G253100	SiLBD20	Nucleus	213	23367.2	5.41	46.89	60.52	-0.311	Chr6
Seita.7G273900	SiLBD21	Nucleus	243	25454.8	9.38	59.66	77.78	-0.063	Chr7
Seita.7G331700	SiLBD22	Nucleus	207	22265.4	7.58	64.56	70.82	-0.228	Chr7
Seita.8G019200	SiLBD23	Nucleus	205	22110.2	6.93	64.01	72.93	-0.206	Chr8
Seita.9G061700	SiLBD24	Nucleus	182	19698.6	9.85	57.76	75.88	-0.337	Chr9
Seita.9G149300	SiLBD25	Nucleus	200	20773.7	8.55	54.53	76.2	-0.055	Chr9
Seita.9G168800	SiLBD26	Nucleus	287	30502.1	6.41	60.1	67.77	-0.378	Chr9
Seita.9G170000	SiLBD27	Nucleus	236	24392.6	7.44	57.2	76.69	-0.039	Chr9
Seita.9G282200	SiLBD28	Nucleus	262	27185.7	6.36	65.93	76.79	-0.109	Chr9
Seita.9G356100	SiLBD29	Nucleus	213	21895	8.64	51.06	79.39	-0.002	Chr9
Seita.9G443300	SiLBD30	Nucleus	241	25811.9	6.63	63.67	69.79	-0.351	Chr9
Seita.9G470000	SiLBD31	Nucleus	259	26931.4	8.25	69.56	71.24	-0.303	Chr9
Seita.9G539400	SiLBD32	Nucleus	238	25037.7	5.65	49.11	62.18	-0.258	Chr9
Seita.9G539500	SiLBD33	Nucleus	178	18533.8	5.89	66.22	61.12	-0.14	Chr9

## Sheet: Table S2
Table S2. Duplication gene pairs of SiLBD genes.
Types of gene duplication of SiLBDs	Gene name	Gene ID	Chr.NO	Start（bp）	End（bp)	Gene name	Gene ID	Chr.NO	Start（bp）	End（bp)
Segmental duplication gene pairs	SiLBD8	Seita.3G240500	3	20432283	20435353	SiLBD17	Seita.5G408700	5	43409247	43412164
	SiLBD21	Seita.7G273900	7	32463138	32464952	SiLBD16	Seita.5G364600	5	40268923	40271734
	SiLBD24	Seita.9G061700	9	3557856	3558727	SiLBD19	Seita.6G214900	6	33152243	33152947
	SiLBD28	Seita.9G282200	9	28876003	28878307	SiLBD31	Seita.9G470000	9	51263503	51266177
	SiLBD5	Seita.2G373900	2	44696498	44697725	SiLBD29	Seita.9G356100	9	41592173	41593384
	SiLBD22	Seita.7G331700	7	35731908	35732853	SiLBD23	Seita.8G019200	8	1087280	1090711

## Sheet: Table S3
Table S3. Duplication gene pairs of AtLBD genes.
Types of gene duplication	Gene ID	Gene name	Gene ID	Gene name
Segmental duplication gene pairs of AtLBDs	AT1G07900	AtLBD2	AT2G28500	AtLBD13
	AT1G07900	AtLBD2	AT2G30130	AtLBD14
	AT1G16350	AtLBD3	AT2G30130	AtLBD14
	AT1G16350	AtLBD3	AT2G28500	AtLBD13
	AT1G16350	AtLBD3	AT5G63090	AtLBD41
	AT1G16350	AtLBD3	AT3G27650	AtLBD28
	AT1G31320	AtLBD4	AT2G30130	AtLBD14
	AT1G31320	AtLBD4	AT1G07900	AtLBD2
	AT1G31320	AtLBD4	AT2G28500	AtLBD13
	AT1G31320	AtLBD4	AT5G63090	AtLBD41
	AT1G31320	AtLBD4	AT2G23660	AtLBD12
	AT1G31320	AtLBD4	AT2G40470	AtLBD17
	AT1G31320	AtLBD4	AT5G66870	AtLBD42
	AT1G31320	AtLBD4	AT3G26620	AtLBD26
	AT1G31320	AtLBD4	AT3G26660	AtLBD27
	AT1G36000	AtLBD5	AT2G19510	AtLBD10
	AT2G30130	AtLBD16	AT3G26620	AtLBD26
	AT2G30340	AtLBD15	AT2G40470	AtLBD17
	AT2G45420	AtLBD21	AT4G00220	AtLBD35
	AT3G11090	AtLBD24	AT2G30130	AtLBD16
	AT3G26620	AtLBD26	AT3G26660	AtLBD27
	AT3G26660	AtLBD27	AT2G30130	AtLBD14
	AT3G27650	AtLBD28	AT5G63090	AtLBD41
	AT3G27650	AtLBD28	AT5G66870	AtLBD42
	AT3G27650	AtLBD28	AT1G65620	AtLBD6
	AT3G27650	AtLBD28	AT2G30130	AtLBD14
	AT3G27650	AtLBD28	AT2G23660	AtLBD12
	AT3G27650	AtLBD28	AT1G16530	AtLBD3
	AT3G27650	AtLBD28	AT2G28500	AtLBD13
	AT3G27650	AtLBD28	AT1G07900	AtLBD2
	AT3G27650	AtLBD28	AT2G40470	AtLBD17
	AT3G49940	AtLBD31	AT5G67420	AtLBD43
	AT5G06080	AtLBD38	AT2G42440	AtLBD19
	AT5G06080	AtLBD38	AT2G42430	AtLBD18
	AT5G63090	AtLBD41	AT1G65620	AtLBD6
	AT5G63090	AtLBD41	AT5G66870	AtLBD42

## Sheet: Table S4
Table S4. Duplication gene pairs of OsLBD genes.
Types of gene duplication	Gene ID	Gene name	Gene ID	Gene name
Segmental duplication gene pairs of OsLBDs	LOC_Os05g34450	OsLBD28	LOC_Os01g66590	OsLBD13
	LOC_Os01g39070	OsLBD6	LOC_Os01g39220	OsLBD10
	LOC_Os11g01550	OsLBD35	LOC_Os12g01550	OsLBD36
	LOC_Os05g07270	OsLBD26	LOC_Os01g60960	OsLBD12

## Sheet: Table S5
Table S5. Cis-elements of SiLBD genes’ promoters
Gene name	cis-element	Sequence	start	end	Type of responsive
SiLBD1	CGTCA-motif	CGTCA	293	298	MeJA responsive
SiLBD1	CGTCA-motif	CGTCA	1130	1135	MeJA responsive
SiLBD1	CGTCA-motif	CGTCA	1247	1252	MeJA responsive
SiLBD1	ABRE	ACGTG	32	37	abscisic acid responsive
SiLBD1	ABRE	CACGTG	479	485	abscisic acid responsive
SiLBD1	ABRE	ACGTG	480	485	abscisic acid responsive
SiLBD1	ABRE	ACGTG	585	590	abscisic acid responsive
SiLBD1	ABRE	ACGTG	1197	1202	abscisic acid responsive
SiLBD1	ABRE	CGTACGTGCA	1202	1211	abscisic acid responsive
SiLBD1	ABRE	ACGTG	1205	1210	abscisic acid responsive
SiLBD1	ABRE	CGTACGTGCA	1206	1215	abscisic acid responsive
SiLBD1	ABRE	ACGTG	1739	1744	abscisic acid responsive
SiLBD1	G-box	CACGTC	31	37	light responsive
SiLBD1	G-box	CACGTG	479	485	light responsive
SiLBD1	G-box	CACGAC	524	530	light responsive
SiLBD1	G-box	TAAACGTG	582	590	light responsive
SiLBD1	G-box	CACGTC	1197	1203	light responsive
SiLBD1	G-box	TACGTG	1204	1210	light responsive
SiLBD1	CAT-box	GCCACT	128	134	meristem expression
SiLBD1	CAT-box	GCCACT	1637	1643	meristem expression
SiLBD1	ARE	AAACCA	326	332	meristem expression
SiLBD1	ARE	AAACCA	806	812	meristem expression
SiLBD1	ARE	AAACCA	1692	1698	meristem expression
SiLBD1	G-Box	CACGTG	479	485	light responsive
SiLBD1	G-Box	CACGTT	584	590	light responsive
SiLBD1	G-Box	CACGTT	1739	1745	light responsive
SiLBD1	GT1-motif	GGTTAA	608	614	light responsive
SiLBD1	LTR	CCGAAA	260	266	low-temperature responsive
SiLBD1	MBS	CAACTG	773	779	drought inducibility
SiLBD1	GARE-motif	TCTGTTG	754	761	gibberellin responsive
SiLBD1	TATA-box	TATAAAA	1235	1242	core promoter element of transcription start
SiLBD1	TATA-box	ATATAT	1528	1534	core promoter element of transcription start
SiLBD1	TATA-box	TATAAAA	1524	1531	core promoter element of transcription start
SiLBD1	TATA-box	TATA	1836	1840	core promoter element of transcription start
SiLBD1	TATA-box	TATAA	1237	1242	core promoter element of transcription start
SiLBD1	TATA-box	TATA	1531	1535	core promoter element of transcription start
SiLBD1	TATA-box	TATATAA	1526	1533	core promoter element of transcription start
SiLBD1	TATA-box	TATA	1938	1942	core promoter element of transcription start
SiLBD1	TATA-box	TATAAA	1236	1242	core promoter element of transcription start
SiLBD1	TATA-box	TATATA	1529	1535	core promoter element of transcription start
SiLBD1	TATA-box	TATAAA	1525	1531	core promoter element of transcription start
SiLBD1	TATA-box	TATA	1583	1587	core promoter element of transcription start
SiLBD1	TATA-box	TATA	1238	1242	core promoter element of transcription start
SiLBD1	TATA-box	TATATA	1527	1533	core promoter element of transcription start
SiLBD1	TGACG-motif	TGACG	293	298	MeJA responsive
SiLBD1	TGACG-motif	TGACG	1130	1135	MeJA responsive
SiLBD1	TGACG-motif	TGACG	1247	1252	MeJA responsive
SiLBD10	TCA-element	TCAGAAGAGG	1533	1542	salicylic acid responsive
SiLBD10	CGTCA-motif	CGTCA	124	129	MeJA responsive
SiLBD10	CGTCA-motif	CGTCA	286	291	MeJA responsive
SiLBD10	CGTCA-motif	CGTCA	1557	1562	MeJA responsive
SiLBD10	LTR	CCGAAA	1676	1682	low-temperature responsive
SiLBD10	G-box	CACGAC	95	101	light responsive
SiLBD10	G-box	CACGAC	514	520	light responsive
SiLBD10	G-box	TAACACGTAG	563	572	light responsive
SiLBD10	G-box	TACGTG	564	570	light responsive
SiLBD10	G-box	CACGAC	1317	1323	light responsive
SiLBD10	G-box	CACGTC	1558	1564	light responsive
SiLBD10	G-box	CACGTG	1785	1791	light responsive
SiLBD10	Box 4	ATTAAT	1610	1616	light responsive
SiLBD10	TCT-motif	TCTTAC	1952	1958	light responsive
SiLBD10	GC-motif	CCCCCG	1766	1772	anoxic specific inducibility
SiLBD10	GC-motif	CCCCCG	1880	1886	anoxic specific inducibility
SiLBD10	Sp1	GGGCGG	258	264	light responsive
SiLBD10	Sp1	GGGCGG	262	268	light responsive
SiLBD10	Sp1	GGGCGG	323	329	light responsive
SiLBD10	Sp1	GGGCGG	1969	1975	light responsive
SiLBD10	ABRE	TACGTGTC	564	572	abscisic acid responsive
SiLBD10	ABRE	ACGTG	565	570	abscisic acid responsive
SiLBD10	ABRE	ACGTG	665	670	abscisic acid responsive
SiLBD10	ABRE	GCAACGTGTC	1133	1142	abscisic acid responsive
SiLBD10	ABRE	ACGTG	1135	1140	abscisic acid responsive
SiLBD10	ABRE	ACGTG	1559	1564	abscisic acid responsive
SiLBD10	ABRE	CACGTG	1785	1791	abscisic acid responsive
SiLBD10	ABRE	ACGTG	1786	1791	abscisic acid responsive
SiLBD10	GT1-motif	GGTTAA	1370	1376	light responsive
SiLBD10	circadian	CAAAGATATC	1154	1163	circadian control
SiLBD10	MBS	CAACTG	194	200	drought inducibility
SiLBD10	Box II	ACACGTAGA	562	571	light responsive
SiLBD10	AuxRR-core	GGTCCAT	825	832	auxin responsive
SiLBD10	TATA-box	ATATAT	1652	1658	core promoter element of transcription start
SiLBD10	TATA-box	TATA	1775	1779	core promoter element of transcription start
SiLBD10	TATA-box	TATA	1615	1619	core promoter element of transcription start
SiLBD10	TATA-box	taTATAAAtc	1609	1618	core promoter element of transcription start
SiLBD10	TATA-box	ATATAT	1614	1620	core promoter element of transcription start
SiLBD10	TATA-box	TATA	1479	1483	core promoter element of transcription start
SiLBD10	TATA-box	TATA	929	933	core promoter element of transcription start
SiLBD10	TATA-box	TATAA	928	933	core promoter element of transcription start
SiLBD10	TATA-box	ATTATA	927	933	core promoter element of transcription start
SiLBD10	TATA-box	TATA	1655	1659	core promoter element of transcription start
SiLBD10	TATA-box	TATATA	1653	1659	core promoter element of transcription start
SiLBD10	TATA-box	TATA	1749	1753	core promoter element of transcription start
SiLBD10	TATA-box	ATATAT	1748	1754	core promoter element of transcription start
SiLBD10	TGACG-motif	TGACG	124	129	MeJA responsive
SiLBD10	TGACG-motif	TGACG	286	291	MeJA responsive
SiLBD10	TGACG-motif	TGACG	1557	1562	MeJA responsive
SiLBD10	G-Box	CACGTT	665	671	light responsive
SiLBD10	G-Box	CACGTT	1135	1141	light responsive
SiLBD10	G-Box	CACGTG	1785	1791	light responsive
SiLBD10	O2-site	GATGATGTGG	1555	1564	zein metabolism regulation
SiLBD11	G-Box	CACGTT	1392	1398	light responsive
SiLBD11	ARE	AAACCA	911	917	meristem expression
SiLBD11	ARE	AAACCA	1056	1062	meristem expression
SiLBD11	ARE	AAACCA	1735	1741	meristem expression
SiLBD11	ARE	AAACCA	1931	1937	meristem expression
SiLBD11	O2-site	GTTGACGTGA	751	760	zein metabolism regulation
SiLBD11	G-box	CACGTC	350	356	light responsive
SiLBD11	G-box	CACGTC	752	758	light responsive
SiLBD11	CAT-box	GCCACT	1802	1808	meristem expression
SiLBD11	AuxRR-core	GGTCCAT	1642	1649	auxin responsive
SiLBD11	TGACG-motif	TGACG	754	759	MeJA responsive
SiLBD11	LTR	CCGAAA	1039	1045	low-temperature responsive
SiLBD11	ABRE	ACGTG	350	355	abscisic acid responsive
SiLBD11	ABRE	ACGTG	752	757	abscisic acid responsive
SiLBD11	ABRE	ACGTG	1393	1398	abscisic acid responsive
SiLBD11	chs-CMA2a	TCACTTGA	1259	1267	light responsive
SiLBD11	CGTCA-motif	CGTCA	754	759	MeJA responsive
SiLBD11	TATA-box	TATA	1940	1944	core promoter element of transcription start
SiLBD11	TATA-box	ATATAT	1949	1955	core promoter element of transcription start
SiLBD11	TATA-box	TATA	1834	1838	core promoter element of transcription start
SiLBD11	TATA-box	TATACA	1832	1838	core promoter element of transcription start
SiLBD11	TATA-box	TATA	1950	1954	core promoter element of transcription start
SiLBD11	TATA-box	TATA	1778	1782	core promoter element of transcription start
SiLBD11	TATA-box	TATAA	1777	1782	core promoter element of transcription start
SiLBD11	TATA-box	ATTATA	1776	1782	core promoter element of transcription start
SiLBD11	TATA-box	TATA	1464	1468	core promoter element of transcription start
SiLBD11	TATA-box	TATA	1148	1152	core promoter element of transcription start
SiLBD11	TATA-box	TATAA	1147	1152	core promoter element of transcription start
SiLBD11	TATA-box	TATA	1108	1112	core promoter element of transcription start
SiLBD11	TATA-box	TATA	1065	1069	core promoter element of transcription start
SiLBD11	TATA-box	TATATA	1063	1069	core promoter element of transcription start
SiLBD11	TATA-box	ATATAT	1064	1070	core promoter element of transcription start
SiLBD11	TATA-box	TATATAA	1062	1069	core promoter element of transcription start
SiLBD11	TATA-box	TATA	595	599	core promoter element of transcription start
SiLBD11	TATA-box	ATTATA	1061	1067	core promoter element of transcription start
SiLBD11	TATA-box	TATAA	594	599	core promoter element of transcription start
SiLBD11	TATA-box	TATAA	558	563	core promoter element of transcription start
SiLBD11	TATA-box	TATA	526	530	core promoter element of transcription start
SiLBD11	TATA-box	TATAA	525	530	core promoter element of transcription start
SiLBD11	TATA-box	ATTATA	524	530	core promoter element of transcription start
SiLBD11	TATA-box	TATA	521	525	core promoter element of transcription start
SiLBD11	TATA-box	ATTATA	593	599	core promoter element of transcription start
SiLBD11	TATA-box	TATA	559	563	core promoter element of transcription start
SiLBD11	TATA-box	ATTATA	557	563	core promoter element of transcription start
SiLBD11	TCT-motif	TCTTAC	359	365	light responsive
SiLBD11	TATC-box	TATCCCA	1309	1316	gibberellin responsive
SiLBD11	GC-motif	CCCCCG	110	116	anoxic specific inducibility
SiLBD11	GATA-motif	GATAGGG	1401	1408	light responsive
SiLBD11	AE-box	AGAAACAA	1746	1754	light responsive
SiLBD12	CAT-box	GCCACT	1206	1212	meristem expression
SiLBD12	ARE	AAACCA	1011	1017	meristem expression
SiLBD12	TATA-box	TATA	994	998	core promoter element of transcription start
SiLBD12	TATA-box	ATATAT	993	999	core promoter element of transcription start
SiLBD12	TATA-box	TATA	968	972	core promoter element of transcription start
SiLBD12	TATA-box	TATACA	966	972	core promoter element of transcription start
SiLBD12	TATA-box	TATA	950	954	core promoter element of transcription start
SiLBD12	TATA-box	TACATAAA	1945	1953	core promoter element of transcription start
SiLBD12	TATA-box	TATA	1654	1658	core promoter element of transcription start
SiLBD12	TATA-box	ATATAA	949	955	core promoter element of transcription start
SiLBD12	TATA-box	TATA	945	949	core promoter element of transcription start
SiLBD12	TATA-box	TATACA	943	949	core promoter element of transcription start
SiLBD12	TATA-box	TATA	769	773	core promoter element of transcription start
SiLBD12	TATA-box	TATAA	768	773	core promoter element of transcription start
SiLBD12	TATA-box	ATTATA	767	773	core promoter element of transcription start
SiLBD12	TATA-box	TATA	641	645	core promoter element of transcription start
SiLBD12	TATA-box	ATATAT	640	646	core promoter element of transcription start
SiLBD12	TATA-box	TATA	561	565	core promoter element of transcription start
SiLBD12	TATA-box	ATATAT	560	566	core promoter element of transcription start
SiLBD12	TATA-box	TATACA	535	541	core promoter element of transcription start
SiLBD12	TATA-box	TATA	537	541	core promoter element of transcription start
SiLBD12	TATA-box	TATA	301	305	core promoter element of transcription start
SiLBD12	TGACG-motif	TGACG	234	239	MeJA responsive
SiLBD12	TCCC-motif	TCTCCCT	1457	1464	light responsive
SiLBD12	TCCC-motif	TCTCCCT	1780	1787	light responsive
SiLBD12	CGTCA-motif	CGTCA	234	239	MeJA responsive
SiLBD12	GATT-motif	CTCCTGATTGGA	1785	1796	light responsive
SiLBD12	GC-motif	CCCCCG	1125	1131	anoxic specific inducibility
SiLBD12	GCN4_motif	TGAGTCA	983	990	endosperm expression
SiLBD12	TGA-element	AACGAC	70	76	auxin responsive
SiLBD12	GATA-motif	GATAGGA	1071	1078	light responsive
SiLBD12	GATA-motif	GATAGGG	1271	1278	light responsive
SiLBD12	GATA-motif	GATAGGG	1795	1802	light responsive
SiLBD13	ABRE	ACGTG	819	824	abscisic acid responsive
SiLBD13	CGTCA-motif	CGTCA	872	877	MeJA responsive
SiLBD13	CGTCA-motif	CGTCA	1048	1053	MeJA responsive
SiLBD13	CGTCA-motif	CGTCA	1284	1289	MeJA responsive
SiLBD13	TGA-element	AACGAC	693	699	auxin responsive
SiLBD13	AE-box	AGAAACAA	89	97	light responsive
SiLBD13	RY-element	CATGCATG	1497	1505	seed specific regulation
SiLBD13	ATCT-motif	AATCTAATCC	375	384	light responsive
SiLBD13	Box 4	ATTAAT	1146	1152	light responsive
SiLBD13	Box 4	ATTAAT	1352	1358	light responsive
SiLBD13	Box 4	ATTAAT	1921	1927	light responsive
SiLBD13	CAT-box	GCCACT	1883	1889	meristem expression
SiLBD13	G-box	CACGTC	818	824	light responsive
SiLBD13	O2-site	GATGA(C/T)(A/G)TG(A/G)	1843	1851	zein metabolism regulation
SiLBD13	ARE	AAACCA	1366	1372	meristem expression
SiLBD13	ATC-motif	AGTAATCT	484	492	light responsive
SiLBD13	TATA-box	TATA	1786	1790	core promoter element of transcription start
SiLBD13	TATA-box	TATAA	1785	1790	core promoter element of transcription start
SiLBD13	TATA-box	TATAAA	1784	1790	core promoter element of transcription start
SiLBD13	TATA-box	TATAAAT	1783	1790	core promoter element of transcription start
SiLBD13	TATA-box	TATA	1774	1778	core promoter element of transcription start
SiLBD13	TATA-box	TATA	1231	1235	core promoter element of transcription start
SiLBD13	TATA-box	TATAA	1773	1778	core promoter element of transcription start
SiLBD13	TATA-box	TATAAA	1772	1778	core promoter element of transcription start
SiLBD13	TATA-box	TATATA	1744	1750	core promoter element of transcription start
SiLBD13	TATA-box	TATA	1746	1750	core promoter element of transcription start
SiLBD13	TATA-box	ATATAT	1743	1749	core promoter element of transcription start
SiLBD13	TATA-box	TATATA	1742	1748	core promoter element of transcription start
SiLBD13	TATA-box	TATAA	1734	1739	core promoter element of transcription start
SiLBD13	TATA-box	TATA	1735	1739	core promoter element of transcription start
SiLBD13	TATA-box	TATAA	1726	1731	core promoter element of transcription start
SiLBD13	TATA-box	TATA	1727	1731	core promoter element of transcription start
SiLBD13	TATA-box	TATA	1576	1580	core promoter element of transcription start
SiLBD13	TATA-box	TATA	1304	1308	core promoter element of transcription start
SiLBD13	TATA-box	TATAA	1303	1308	core promoter element of transcription start
SiLBD13	TATA-box	ATTATA	1302	1308	core promoter element of transcription start
SiLBD13	TATA-box	TATA	1154	1158	core promoter element of transcription start
SiLBD13	TATA-box	ATATAA	1153	1159	core promoter element of transcription start
SiLBD13	TATA-box	TATA	1089	1093	core promoter element of transcription start
SiLBD13	TATA-box	TATACA	1087	1093	core promoter element of transcription start
SiLBD13	TATA-box	TATA	859	863	core promoter element of transcription start
SiLBD13	TATA-box	TATA	654	658	core promoter element of transcription start
SiLBD13	TATA-box	TATACA	857	863	core promoter element of transcription start
SiLBD13	TATA-box	TATACA	652	658	core promoter element of transcription start
SiLBD13	TATA-box	TATA	354	358	core promoter element of transcription start
SiLBD13	TATA-box	TATATA	327	333	core promoter element of transcription start
SiLBD13	TATA-box	TATAA	64	69	core promoter element of transcription start
SiLBD13	TATA-box	TATATAA	326	333	core promoter element of transcription start
SiLBD13	TATA-box	ATTATA	63	69	core promoter element of transcription start
SiLBD13	TATA-box	ATTATA	325	331	core promoter element of transcription start
SiLBD13	TATA-box	TATA	333	337	core promoter element of transcription start
SiLBD13	TATA-box	TATATA	329	335	core promoter element of transcription start
SiLBD13	TATA-box	ATATAA	332	338	core promoter element of transcription start
SiLBD13	TATA-box	ATATAT	328	334	core promoter element of transcription start
SiLBD13	TATA-box	ATATAT	330	336	core promoter element of transcription start
SiLBD13	TATA-box	TATATA	331	337	core promoter element of transcription start
SiLBD13	TATA-box	TATA	65	69	core promoter element of transcription start
SiLBD13	TGACG-motif	TGACG	872	877	MeJA responsive
SiLBD13	TGACG-motif	TGACG	1048	1053	MeJA responsive
SiLBD13	TGACG-motif	TGACG	1284	1289	MeJA responsive
SiLBD13	ACE	GCGACGTACC	344	353	light responsive
SiLBD13	circadian	CAAAGATATC	517	526	circadian control
SiLBD13	MBS	CAACTG	568	574	drought inducibility
SiLBD14	G-box	tgACACGTGGCA	519	530	light responsive
SiLBD14	G-box	ACACGTGGC	520	529	light responsive
SiLBD14	G-box	CACGTG	522	528	light responsive
SiLBD14	ARE	AAACCA	54	60	meristem expression
SiLBD14	ARE	AAACCA	448	454	meristem expression
SiLBD14	ARE	AAACCA	857	863	meristem expression
SiLBD14	ARE	AAACCA	921	927	meristem expression
SiLBD14	G-Box	CACGTG	522	528	light responsive
SiLBD14	G-Box	CACGTT	642	648	light responsive
SiLBD14	GT1-motif	GGTTAA	1370	1376	light responsive
SiLBD14	MBS	CAACTG	1485	1491	drought inducibility
SiLBD14	LTR	CCGAAA	563	569	low-temperature responsive
SiLBD14	TATA-box	TACAAAA	1233	1240	core promoter element of transcription start
SiLBD14	TATA-box	TATA	739	743	core promoter element of transcription start
SiLBD14	TATA-box	TATAA	738	743	core promoter element of transcription start
SiLBD14	TATA-box	ATTATA	662	668	core promoter element of transcription start
SiLBD14	TATA-box	TATA	664	668	core promoter element of transcription start
SiLBD14	TATA-box	TATA	803	807	core promoter element of transcription start
SiLBD14	TATA-box	TATAAGAA	735	743	core promoter element of transcription start
SiLBD14	TATA-box	TATAA	663	668	core promoter element of transcription start
SiLBD14	TGACG-motif	TGACG	255	260	MeJA responsive
SiLBD14	TGACG-motif	TGACG	690	695	MeJA responsive
SiLBD14	TGACG-motif	TGACG	1955	1960	MeJA responsive
SiLBD14	TCCC-motif	TCTCCCT	1910	1917	light responsive
SiLBD14	CGTCA-motif	CGTCA	255	260	MeJA responsive
SiLBD14	CGTCA-motif	CGTCA	690	695	MeJA responsive
SiLBD14	CGTCA-motif	CGTCA	1955	1960	MeJA responsive
SiLBD14	LAMP-element	CTTTATCA	679	687	light responsive
SiLBD14	ABRE	GCAACGTGTC	520	529	abscisic acid responsive
SiLBD14	ABRE	CACGTG	522	528	abscisic acid responsive
SiLBD14	ABRE	ACGTG	523	528	abscisic acid responsive
SiLBD14	ABRE	CGTACGTGCA	640	649	abscisic acid responsive
SiLBD14	ABRE	ACGTG	643	648	abscisic acid responsive
SiLBD14	Sp1	GGGCGG	228	234	light responsive
SiLBD14	Box 4	ATTAAT	1421	1427	light responsive
SiLBD14	TGA-element	AACGAC	817	823	auxin responsive
SiLBD15	G-box	CACGAC	594	600	light responsive
SiLBD15	G-box	CACGAC	622	628	light responsive
SiLBD15	G-box	CAGACGTGGCA	910	920	light responsive
SiLBD15	G-box	CACGTC	913	919	light responsive
SiLBD15	G-box	CACGAC	1447	1453	light responsive
SiLBD15	TGACG-motif	TGACG	840	845	MeJA responsive
SiLBD15	TGACG-motif	TGACG	1385	1390	MeJA responsive
SiLBD15	TGACG-motif	TGACG	1925	1930	MeJA responsive
SiLBD15	MBS	CAACTG	504	510	drought inducibility
SiLBD15	MBS	CAACTG	1653	1659	drought inducibility
SiLBD15	Sp1	GGGCGG	1197	1203	light responsive
SiLBD15	Sp1	GGGCGG	1327	1333	light responsive
SiLBD15	Sp1	GGGCGG	1785	1791	light responsive
SiLBD15	Sp1	GGGCGG	1801	1807	light responsive
SiLBD15	ABRE	ACGTG	913	918	abscisic acid responsive
SiLBD15	LAMP-element	CTTTATCA	100	108	light responsive
SiLBD15	CGTCA-motif	CGTCA	840	845	MeJA responsive
SiLBD15	CGTCA-motif	CGTCA	1385	1390	MeJA responsive
SiLBD15	CGTCA-motif	CGTCA	1925	1930	MeJA responsive
SiLBD15	GC-motif	CCCCCG	1119	1125	anoxic specific inducibility
SiLBD15	GC-motif	CCCCCG	1848	1854	anoxic specific inducibility
SiLBD15	ATCT-motif	AATCTAATCC	1041	1050	light responsive
SiLBD15	GATA-motif	AAGGATAAGG	449	458	light responsive
SiLBD15	AE-box	AGAAACTT	310	318	light responsive
SiLBD15	AE-box	AGAAACAA	699	707	light responsive
SiLBD15	AE-box	AGAAACAA	732	740	light responsive
SiLBD16	LAMP-element	CCTTATCCA	489	498	light responsive
SiLBD16	ABRE	ACGTG	1682	1687	abscisic acid responsive
SiLBD16	CGTCA-motif	CGTCA	1425	1430	MeJA responsive
SiLBD16	CGTCA-motif	CGTCA	1674	1679	MeJA responsive
SiLBD16	TATA-box	ATTATA	1432	1438	core promoter element of transcription start
SiLBD16	TATA-box	TATA	512	516	core promoter element of transcription start
SiLBD16	TATA-box	TATA	676	680	core promoter element of transcription start
SiLBD16	TATA-box	TATAA	675	680	core promoter element of transcription start
SiLBD16	TATA-box	TATA	1434	1438	core promoter element of transcription start
SiLBD16	TATA-box	TATA	816	820	core promoter element of transcription start
SiLBD16	TATA-box	TATA	1825	1829	core promoter element of transcription start
SiLBD16	TATA-box	TATA	771	775	core promoter element of transcription start
SiLBD16	TATA-box	ATTATA	674	680	core promoter element of transcription start
SiLBD16	TATA-box	TATATA	796	802	core promoter element of transcription start
SiLBD16	TATA-box	TATAA	770	775	core promoter element of transcription start
SiLBD16	TATA-box	TATAA	1433	1438	core promoter element of transcription start
SiLBD16	TATA-box	TATAAA	769	775	core promoter element of transcription start
SiLBD16	TATA-box	TATAAAT	768	775	core promoter element of transcription start
SiLBD16	TATA-box	TATA	1791	1795	core promoter element of transcription start
SiLBD16	TATA-box	TATATA	814	820	core promoter element of transcription start
SiLBD16	TATA-box	TATAA	469	474	core promoter element of transcription start
SiLBD16	TATA-box	ATATAA	511	517	core promoter element of transcription start
SiLBD16	TATA-box	TATAA	1506	1511	core promoter element of transcription start
SiLBD16	TATA-box	ATTATA	1505	1511	core promoter element of transcription start
SiLBD16	TATA-box	taTATAAAtc	767	776	core promoter element of transcription start
SiLBD16	TATA-box	TATA	1507	1511	core promoter element of transcription start
SiLBD16	TATA-box	TATA	553	557	core promoter element of transcription start
SiLBD16	TATA-box	TATA	470	474	core promoter element of transcription start
SiLBD16	TATA-box	ATATAA	1790	1796	core promoter element of transcription start
SiLBD16	TATA-box	TATA	798	802	core promoter element of transcription start
SiLBD16	TCT-motif	TCTTAC	419	425	light responsive
SiLBD16	GATA-motif	GATAGGG	11	18	light responsive
SiLBD16	GATA-motif	AAGATAAGATT	896	907	light responsive
SiLBD16	G-box	CACGAC	567	573	light responsive
SiLBD16	G-box	CACGAC	1113	1119	light responsive
SiLBD16	G-Box	CACGTT	1681	1687	light responsive
SiLBD16	CAG-motif	GAAAGGCAGAC	1769	1779	light responsive
SiLBD16	TGACG-motif	TGACG	1425	1430	MeJA responsive
SiLBD16	TGACG-motif	TGACG	1674	1679	MeJA responsive
SiLBD16	I-box	GTATAAGGCC	1599	1608	light responsive
SiLBD16	MSA-like	TCCAACGGT	1882	1891	cell cycle regulation
SiLBD16	ACE	GACACGTATG	1472	1481	light responsive
SiLBD16	chs-CMA1a	TTACTTAA	689	697	light responsive
SiLBD16	GT1-motif	GGTTAA	1530	1536	light responsive
SiLBD16	MBS	CAACTG	1624	1630	drought inducibility
SiLBD17	CAT-box	GCCACT	626	632	meristem expression
SiLBD17	CAT-box	GCCACT	655	661	meristem expression
SiLBD17	CAT-box	GCCACT	1834	1840	meristem expression
SiLBD17	MBSI	TTTTTACGGTTA	1901	1912	flavonoid biosynthetic genes regulation
SiLBD17	ARE	AAACCA	869	875	meristem expression
SiLBD17	ARE	AAACCA	1887	1893	meristem expression
SiLBD17	MRE	AACCTAA	1511	1518	light responsive
SiLBD17	TATA-box	TATA	1899	1903	core promoter element of transcription start
SiLBD17	TATA-box	TATAA	1180	1185	core promoter element of transcription start
SiLBD17	TATA-box	TATAAA	1179	1185	core promoter element of transcription start
SiLBD17	TATA-box	ATATAA	1898	1904	core promoter element of transcription start
SiLBD17	TATA-box	TATA	1181	1185	core promoter element of transcription start
SiLBD17	TATA-box	TATA	649	653	core promoter element of transcription start
SiLBD17	TATA-box	TATA	347	351	core promoter element of transcription start
SiLBD17	TATA-box	TATAA	1004	1009	core promoter element of transcription start
SiLBD17	TATA-box	TATA	683	687	core promoter element of transcription start
SiLBD17	TATA-box	TATA	933	937	core promoter element of transcription start
SiLBD17	TATA-box	ATATAT	646	652	core promoter element of transcription start
SiLBD17	TATA-box	TATAAAA	1178	1185	core promoter element of transcription start
SiLBD17	TATA-box	TATA	1005	1009	core promoter element of transcription start
SiLBD17	TATA-box	TATA	692	696	core promoter element of transcription start
SiLBD17	TATA-box	ATATAT	932	938	core promoter element of transcription start
SiLBD17	TATA-box	TATA	403	407	core promoter element of transcription start
SiLBD17	TATA-box	TATA	740	744	core promoter element of transcription start
SiLBD17	TATA-box	TATATA	647	653	core promoter element of transcription start
SiLBD17	TATA-box	ATATAA	648	654	core promoter element of transcription start
SiLBD17	TATA-box	ATATAT	224	230	core promoter element of transcription start
SiLBD17	TATA-box	TATACA	50	56	core promoter element of transcription start
SiLBD17	TATA-box	TATA	52	56	core promoter element of transcription start
SiLBD17	TATA-box	TATA	795	799	core promoter element of transcription start
SiLBD17	TATA-box	TATA	225	229	core promoter element of transcription start
SiLBD17	TATA-box	TATA	714	718	core promoter element of transcription start
SiLBD17	TATA-box	ATATAT	346	352	core promoter element of transcription start
SiLBD17	TATA-box	TATA	295	299	core promoter element of transcription start
SiLBD17	TATA-box	TATA	302	306	core promoter element of transcription start
SiLBD17	TATA-box	TACAAAA	47	54	core promoter element of transcription start
SiLBD17	TGACG-motif	TGACG	21	26	MeJA responsive
SiLBD17	TGACG-motif	TGACG	758	763	MeJA responsive
SiLBD17	TGACG-motif	TGACG	1354	1359	MeJA responsive
SiLBD17	I-box	gGATAAGGTG	836	845	light responsive
SiLBD17	MBS	CAACTG	1050	1056	drought inducibility
SiLBD17	MBS	CAACTG	1341	1347	drought inducibility
SiLBD17	MBS	CAACTG	1757	1763	drought inducibility
SiLBD17	CGTCA-motif	CGTCA	21	26	MeJA responsive
SiLBD17	CGTCA-motif	CGTCA	758	763	MeJA responsive
SiLBD17	CGTCA-motif	CGTCA	1354	1359	MeJA responsive
SiLBD17	TC-rich repeats	ATTCTCTAAC	1327	1336	defense and stress responsive
SiLBD17	GCN4_motif	TGAGTCA	1780	1787	endosperm expression
SiLBD17	TGA-element	AACGAC	860	866	auxin responsive
SiLBD17	Box 4	ATTAAT	746	752	light responsive
SiLBD18	AAAC-motif	CAATCAAAACCT	120	131	light responsive
SiLBD18	ABRE	AACCCGG	37	44	abscisic acid responsive
SiLBD18	ABRE	ACGTG	171	176	abscisic acid responsive
SiLBD18	ABRE	ACGTG	637	642	abscisic acid responsive
SiLBD18	ABRE	GCCGCGTGGC	713	722	abscisic acid responsive
SiLBD18	ABRE	ACGTG	1435	1440	abscisic acid responsive
SiLBD18	ABRE	ACGTG	1765	1770	abscisic acid responsive
SiLBD18	Box 4	ATTAAT	130	136	light responsive
SiLBD18	Box 4	ATTAAT	1836	1842	light responsive
SiLBD18	GATA-motif	GATAGGA	10	17	light responsive
SiLBD18	GATA-motif	GATAGGG	807	814	light responsive
SiLBD18	TATA-box	TATA	1133	1137	core promoter element of transcription start
SiLBD18	TATA-box	TATA	520	524	core promoter element of transcription start
SiLBD18	TATA-box	TATAA	1376	1381	core promoter element of transcription start
SiLBD18	TATA-box	TATA	1002	1006	core promoter element of transcription start
SiLBD18	TATA-box	ccTATAAAaa	1798	1807	core promoter element of transcription start
SiLBD18	TATA-box	TATA	973	977	core promoter element of transcription start
SiLBD18	TATA-box	TATA	1405	1409	core promoter element of transcription start
SiLBD18	TATA-box	TATATA	1131	1137	core promoter element of transcription start
SiLBD18	TATA-box	TATA	1453	1457	core promoter element of transcription start
SiLBD18	TATA-box	TATATA	518	524	core promoter element of transcription start
SiLBD18	TATA-box	TATACA	516	522	core promoter element of transcription start
SiLBD18	TATA-box	TATA	1635	1639	core promoter element of transcription start
SiLBD18	TATA-box	ATATAA	1132	1138	core promoter element of transcription start
SiLBD18	TATA-box	TATA	1377	1381	core promoter element of transcription start
SiLBD18	TATA-box	TATA	1386	1390	core promoter element of transcription start
SiLBD18	TATA-box	ATATAA	519	525	core promoter element of transcription start
SiLBD18	TATA-box	TATATAA	1130	1137	core promoter element of transcription start
SiLBD18	TGA-element	AACGAC	1753	1759	auxin responsive
SiLBD18	P-box	CCTTTTG	1420	1427	gibberellin responsive
SiLBD18	GC-motif	CCCCCG	420	426	anoxic specific inducibility
SiLBD18	GC-motif	CCCCCG	441	447	anoxic specific inducibility
SiLBD18	GC-motif	CCCCCG	1917	1923	anoxic specific inducibility
SiLBD18	ARE	AAACCA	1100	1106	meristem expression
SiLBD18	ARE	AAACCA	1283	1289	meristem expression
SiLBD18	ARE	AAACCA	1626	1632	meristem expression
SiLBD18	G-Box	CACGTT	1434	1440	light responsive
SiLBD18	CAT-box	GCCACT	1638	1644	meristem expression
SiLBD18	G-box	TACGTG	171	177	light responsive
SiLBD18	G-box	CACGTC	637	643	light responsive
SiLBD18	G-box	CACGTC	1765	1771	light responsive
SiLBD18	G-box	CACGAC	1944	1950	light responsive
SiLBD18	O2-site	GTTGACGTGA	636	645	zein metabolism regulation
SiLBD18	O2-site	GTTGACGTGA	1431	1440	zein metabolism regulation
SiLBD18	GT1-motif	GGTTAA	1112	1118	light responsive
SiLBD18	GT1-motif	GGTTAA	1430	1436	light responsive
SiLBD18	MBS	CAACTG	53	59	drought inducibility
SiLBD18	MBS	CAACTG	1476	1482	drought inducibility
SiLBD18	I-box	TGATAATGT	888	897	light responsive
SiLBD18	ACA-motif	AATTACAGCCATT	1221	1233	light responsive
SiLBD19	G-box	CACGTG	973	979	light responsive
SiLBD19	G-Box	CACGTT	215	221	light responsive
SiLBD19	G-Box	CACGTT	533	539	light responsive
SiLBD19	G-Box	CACGTG	973	979	light responsive
SiLBD19	LTR	CCGAAA	932	938	low-temperature responsive
SiLBD19	GARE-motif	TCTGTTG	1095	1102	gibberellin responsive
SiLBD19	TATA-box	TATA	526	530	core promoter element of transcription start
SiLBD19	TATA-box	TATAA	329	334	core promoter element of transcription start
SiLBD19	TATA-box	TATAAA	328	334	core promoter element of transcription start
SiLBD19	TATA-box	TATA	583	587	core promoter element of transcription start
SiLBD19	TATA-box	TATATTTATATTT	324	336	core promoter element of transcription start
SiLBD19	TATA-box	TATA	1545	1549	core promoter element of transcription start
SiLBD19	TATA-box	TATAAAT	327	334	core promoter element of transcription start
SiLBD19	TATA-box	ATTATA	318	324	core promoter element of transcription start
SiLBD19	TATA-box	TATATA	1871	1877	core promoter element of transcription start
SiLBD19	TATA-box	TATATA	322	328	core promoter element of transcription start
SiLBD19	TATA-box	TATA	330	334	core promoter element of transcription start
SiLBD19	TATA-box	TATA	1873	1877	core promoter element of transcription start
SiLBD19	TATA-box	TATAAATA	326	334	core promoter element of transcription start
SiLBD19	TATA-box	ATATAT	321	327	core promoter element of transcription start
SiLBD19	TATA-box	ATATAT	323	329	core promoter element of transcription start
SiLBD19	TATA-box	TATATAA	319	326	core promoter element of transcription start
SiLBD19	TATA-box	TATA	344	348	core promoter element of transcription start
SiLBD19	TATA-box	TATATA	320	326	core promoter element of transcription start
SiLBD19	TATA-box	ATATAA	1872	1878	core promoter element of transcription start
SiLBD19	TATA-box	TATA	1997	2001	core promoter element of transcription start
SiLBD19	TGACG-motif	TGACG	1504	1509	MeJA responsive
SiLBD19	TGACG-motif	TGACG	1507	1512	MeJA responsive
SiLBD19	TGACG-motif	TGACG	1585	1590	MeJA responsive
SiLBD19	CGTCA-motif	CGTCA	1504	1509	MeJA responsive
SiLBD19	CGTCA-motif	CGTCA	1507	1512	MeJA responsive
SiLBD19	CGTCA-motif	CGTCA	1585	1590	MeJA responsive
SiLBD19	chs-CMA2a	TCACTTGA	960	968	light responsive
SiLBD19	Sp1	GGGCGG	29	35	light responsive
SiLBD19	Sp1	GGGCGG	1796	1802	light responsive
SiLBD19	ABRE	ACGTG	215	220	abscisic acid responsive
SiLBD19	ABRE	ACGTG	533	538	abscisic acid responsive
SiLBD19	ABRE	CACGTG	973	979	abscisic acid responsive
SiLBD19	ABRE	ACGTG	974	979	abscisic acid responsive
SiLBD19	ABRE	CGTACGTGCA	1414	1423	abscisic acid responsive
SiLBD19	ATCT-motif	AATCTAATCC	1365	1374	light responsive
SiLBD19	Box 4	ATTAAT	264	270	light responsive
SiLBD19	Box 4	ATTAAT	293	299	light responsive
SiLBD19	TCA-element	CCATCTTTTT	440	449	salicylic acid responsive
SiLBD19	GCN4_motif	TGAGTCA	1323	1330	endosperm expression
SiLBD19	TGA-element	AACGAC	573	579	auxin responsive
SiLBD2	ATC-motif	AGTAATCT	510	518	light responsive
SiLBD2	O2-site	GATGATGTGG	1395	1404	zein metabolism regulation
SiLBD2	ARE	AAACCA	281	287	meristem expression
SiLBD2	MBS	CAACTG	1859	1865	drought inducibility
SiLBD2	TGACG-motif	TGACG	1475	1480	MeJA responsive
SiLBD2	ACE	GCGACGTACC	1502	1511	light responsive
SiLBD2	I-box	atGATAAGGTC	1706	1716	light responsive
SiLBD2	TCCC-motif	TCTCCCT	694	701	light responsive
SiLBD2	ABRE	ACGTG	1651	1656	abscisic acid responsive
SiLBD2	Sp1	GGGCGG	1227	1233	light responsive
SiLBD2	Sp1	GGGCGG	1269	1275	light responsive
SiLBD2	Sp1	GGGCGG	1323	1329	light responsive
SiLBD2	Box 4	ATTAAT	596	602	light responsive
SiLBD2	Box 4	ATTAAT	800	806	light responsive
SiLBD2	Box 4	ATTAAT	832	838	light responsive
SiLBD2	TATA-box	TACAAAA	1894	1901	core promoter element of transcription start
SiLBD2	TATA-box	TATA	1717	1721	core promoter element of transcription start
SiLBD2	TATA-box	TACAAAA	1021	1028	core promoter element of transcription start
SiLBD2	TATA-box	TATA	1761	1765	core promoter element of transcription start
SiLBD2	TATA-box	TATA	439	443	core promoter element of transcription start
SiLBD2	TATA-box	ATTATA	1715	1721	core promoter element of transcription start
SiLBD2	TATA-box	TATAA	1716	1721	core promoter element of transcription start
SiLBD2	TATA-box	TATAA	438	443	core promoter element of transcription start
SiLBD2	TATA-box	TATA	182	186	core promoter element of transcription start
SiLBD2	TATA-box	TATA	1711	1715	core promoter element of transcription start
SiLBD2	TATA-box	ATTATA	437	443	core promoter element of transcription start
SiLBD2	TATA-box	TATAA	1710	1715	core promoter element of transcription start
SiLBD2	TATA-box	TATA	658	662	core promoter element of transcription start
SiLBD2	TATA-box	TATACA	656	662	core promoter element of transcription start
SiLBD2	TCT-motif	TCTTAC	1660	1666	light responsive
SiLBD2	G-box	TACGTG	1651	1657	light responsive
SiLBD2	GARE-motif	TCTGTTG	422	429	gibberellin responsive
SiLBD2	CGTCA-motif	CGTCA	1475	1480	MeJA responsive
SiLBD2	Gap-box	CAAATGAA(A/G)A	498	507	light responsive
SiLBD2	Pc-CMA2c	GCCCACGCA	1325	1334	light responsive
SiLBD2	AE-box	AGAAACAA	305	313	light responsive
SiLBD2	AE-box	AGAAACAA	965	973	light responsive
SiLBD2	TGA-element	AACGAC	358	364	auxin responsive
SiLBD20	Box 4	ATTAAT	82	88	light responsive
SiLBD20	Box 4	ATTAAT	109	115	light responsive
SiLBD20	Box 4	ATTAAT	998	1004	light responsive
SiLBD20	Box 4	ATTAAT	1904	1910	light responsive
SiLBD20	GATA-motif	AAGATAAGATT	1672	1682	light responsive
SiLBD20	ATCT-motif	AATCTAATCC	1490	1499	light responsive
SiLBD20	AE-box	AGAAACAA	1513	1521	light responsive
SiLBD20	TATA-box	TATA	1899	1903	core promoter element of transcription start
SiLBD20	TATA-box	TATAA	841	846	core promoter element of transcription start
SiLBD20	TATA-box	ATATAA	1898	1904	core promoter element of transcription start
SiLBD20	TATA-box	TACAAAA	1748	1755	core promoter element of transcription start
SiLBD20	TATA-box	TATA	1611	1615	core promoter element of transcription start
SiLBD20	TATA-box	TATAAA	840	846	core promoter element of transcription start
SiLBD20	TATA-box	TATA	1546	1550	core promoter element of transcription start
SiLBD20	TATA-box	TATA	106	110	core promoter element of transcription start
SiLBD20	TATA-box	TATA	743	747	core promoter element of transcription start
SiLBD20	TATA-box	tcTATAAATAgg	1947	1958	core promoter element of transcription start
SiLBD20	TATA-box	TATATA	741	747	core promoter element of transcription start
SiLBD20	TATA-box	ATATAT	105	111	core promoter element of transcription start
SiLBD20	TATA-box	ATATAA	1570	1576	core promoter element of transcription start
SiLBD20	TATA-box	TATA	1949	1953	core promoter element of transcription start
SiLBD20	TATA-box	TATAA	1545	1550	core promoter element of transcription start
SiLBD20	TATA-box	TATA	842	846	core promoter element of transcription start
SiLBD20	TATA-box	TATA	1571	1575	core promoter element of transcription start
SiLBD20	TATA-box	TACAAAA	560	567	core promoter element of transcription start
SiLBD20	TATA-box	TATA	815	819	core promoter element of transcription start
SiLBD20	TATA-box	TATA	568	572	core promoter element of transcription start
SiLBD20	TATA-box	TATAA	814	819	auxin responsive
SiLBD20	TGA-element	AACGAC	752	758	auxin responsive
SiLBD20	TGA-element	AACGAC	1775	1781	auxin responsive
SiLBD20	P-box	CCTTTTG	1620	1627	gibberellin responsive
SiLBD20	TCA-element	TCAGAAGAGG	1426	1435	salicylic acid responsive
SiLBD20	CGTCA-motif	CGTCA	541	546	MeJA responsive
SiLBD20	ABRE	CACGTG	320	326	abscisic acid responsive
SiLBD20	ABRE	ACGTG	321	326	abscisic acid responsive
SiLBD20	ABRE	ACGTG	534	539	abscisic acid responsive
SiLBD20	ABRE	ACGTG	1376	1381	abscisic acid responsive
SiLBD20	MBS	CAACTG	236	242	drought inducibility
SiLBD20	MBS	CAACTG	359	365	drought inducibility
SiLBD20	GT1-motif	GGTTAA	1787	1793	light responsive
SiLBD20	4cl-CMA1b	ATTCCGATAAACT	780	792	light responsive
SiLBD20	AuxRR-core	GGTCCAT	31	38	auxin responsive
SiLBD20	AuxRR-core	GGTCCAT	632	639	auxin responsive
SiLBD20	TGACG-motif	TGACG	541	546	MeJA responsive
SiLBD20	MRE	AACCTAA	346	353	light responsive
SiLBD20	MRE	AACCTAA	450	457	light responsive
SiLBD20	G-Box	CACGTG	320	326	light responsive
SiLBD20	G-Box	CACGTT	1375	1381	light responsive
SiLBD20	ARE	AAACCA	605	611	meristem expression
SiLBD20	G-box	GCCACGTGGA	318	327	light responsive
SiLBD20	G-box	CACGTG	320	326	light responsive
SiLBD20	G-box	TACGTG	534	540	light responsive
SiLBD21	O2-site	GATGACATGG	417	426	zein metabolism regulation
SiLBD21	O2-site	GATGATGTGG	1672	1681	zein metabolism regulation
SiLBD21	G-box	GCCACGTGGA	123	132	light responsive
SiLBD21	G-box	CACGTG	125	131	light responsive
SiLBD21	G-box	CACGTC	563	569	light responsive
SiLBD21	CAT-box	GCCACT	584	590	meristem expression
SiLBD21	G-Box	CACGTG	125	131	light responsive
SiLBD21	ARE	AAACCA	1713	1719	meristem expression
SiLBD21	ARE	AAACCA	1756	1762	meristem expression
SiLBD21	Box II	CCACGTGGC	123	132	light responsive
SiLBD21	LTR	CCGAAA	797	803	low-temperature responsive
SiLBD21	LTR	CCGAAA	857	863	low-temperature responsive
SiLBD21	GT1-motif	GGTTAA	1141	1147	light responsive
SiLBD21	TATA-box	TATA	1911	1915	core promoter element of transcription start
SiLBD21	TATA-box	TATA	1551	1555	core promoter element of transcription start
SiLBD21	TATA-box	TATTTAAA	1514	1522	core promoter element of transcription start
SiLBD21	TATA-box	TATATAA	1309	1316	core promoter element of transcription start
SiLBD21	TATA-box	ATATAA	1550	1556	core promoter element of transcription start
SiLBD21	TATA-box	ATTATA	1308	1314	core promoter element of transcription start
SiLBD21	TATA-box	TATATA	1549	1555	core promoter element of transcription start
SiLBD21	TATA-box	TATA	1300	1304	core promoter element of transcription start
SiLBD21	TATA-box	TATATAA	1548	1555	core promoter element of transcription start
SiLBD21	TATA-box	TATA	1372	1376	core promoter element of transcription start
SiLBD21	TATA-box	TATAA	1371	1376	core promoter element of transcription start
SiLBD21	TATA-box	TATA	1206	1210	core promoter element of transcription start
SiLBD21	TATA-box	ATTATA	1370	1376	core promoter element of transcription start
SiLBD21	TATA-box	TATA	1312	1316	core promoter element of transcription start
SiLBD21	TATA-box	TATATA	1310	1316	core promoter element of transcription start
SiLBD21	TATA-box	TATA	1194	1198	core promoter element of transcription start
SiLBD21	TATA-box	TATA	1113	1117	core promoter element of transcription start
SiLBD21	TATA-box	ATATAT	1203	1209	core promoter element of transcription start
SiLBD21	TATA-box	ATATAA	1112	1118	core promoter element of transcription start
SiLBD21	TATA-box	TATA	529	533	core promoter element of transcription start
SiLBD21	TATA-box	TATAAA	527	533	core promoter element of transcription start
SiLBD21	TATA-box	TATATA	1204	1210	core promoter element of transcription start
SiLBD21	TATA-box	TATAA	528	533	core promoter element of transcription start
SiLBD21	TGACG-motif	TGACG	8	13	MeJA responsive
SiLBD21	TGACG-motif	TGACG	562	567	MeJA responsive
SiLBD21	TGACG-motif	TGACG	674	679	MeJA responsive
SiLBD21	TGACG-motif	TGACG	833	838	MeJA responsive
SiLBD21	TGACG-motif	TGACG	1457	1462	MeJA responsive
SiLBD21	CGTCA-motif	CGTCA	8	13	MeJA responsive
SiLBD21	CGTCA-motif	CGTCA	562	567	MeJA responsive
SiLBD21	CGTCA-motif	CGTCA	674	679	MeJA responsive
SiLBD21	CGTCA-motif	CGTCA	833	838	MeJA responsive
SiLBD21	CGTCA-motif	CGTCA	1457	1462	MeJA responsive
SiLBD21	Sp1	GGGCGG	110	116	light responsive
SiLBD21	ABRE	CACGTG	125	131	abscisic acid responsive
SiLBD21	ABRE	ACGTG	126	131	abscisic acid responsive
SiLBD21	ABRE	ACGTG	564	569	abscisic acid responsive
SiLBD21	LAMP-element	CCTTATCCA	1445	1454	light responsive
SiLBD21	GATA-motif	GATAGGG	732	739	light responsive
SiLBD21	GATA-motif	GATAGGA	1663	1670	light responsive
SiLBD21	Box 4	ATTAAT	1108	1114	light responsive
SiLBD21	GC-motif	CCCCCG	594	600	anoxic specific inducibility
SiLBD21	TGA-element	AACGAC	303	309	auxin responsive
SiLBD22	ABRE	ACGTG	512	517	abscisic acid responsive
SiLBD22	ABRE	TACGTGTC	1197	1205	abscisic acid responsive
SiLBD22	ABRE	ACGTG	1198	1203	abscisic acid responsive
SiLBD22	ABRE	CGTACGTGCA	1270	1279	abscisic acid responsive
SiLBD22	ABRE	GACACGTACGT	1472	1482	abscisic acid responsive
SiLBD22	ABRE	TACGTGTC	1475	1483	abscisic acid responsive
SiLBD22	ABRE	ACGTG	1476	1481	abscisic acid responsive
SiLBD22	CGTCA-motif	CGTCA	373	378	MeJA responsive
SiLBD22	CGTCA-motif	CGTCA	492	497	MeJA responsive
SiLBD22	CGTCA-motif	CGTCA	1040	1045	MeJA responsive
SiLBD22	CGTCA-motif	CGTCA	1492	1497	MeJA responsive
SiLBD22	TCT-motif	TCTTAC	24	30	light responsive
SiLBD22	TCA-element	CCATCTTTTT	1617	1626	salicylic acid responsive
SiLBD22	TGA-element	AACGAC	1147	1153	auxin responsive
SiLBD22	TGA-element	AACGAC	1541	1547	auxin responsive
SiLBD22	AE-box	AGAAACTT	19	27	light responsive
SiLBD22	RY-element	CATGCATG	913	921	seed specific regulation
SiLBD22	RY-element	CATGCATG	1268	1276	seed specific regulation
SiLBD22	RY-element	CATGCATG	1439	1447	seed specific regulation
SiLBD22	RY-element	CATGCATG	1854	1862	seed specific regulation
SiLBD22	ATCT-motif	AATCTAATCC	1588	1597	light responsive
SiLBD22	Box 4	ATTAAT	569	575	light responsive
SiLBD22	Box 4	ATTAAT	983	989	light responsive
SiLBD22	Box 4	ATTAAT	1698	1704	light responsive
SiLBD22	G-box	TACGTG	511	517	light responsive
SiLBD22	G-box	TACGTG	1197	1203	light responsive
SiLBD22	G-box	CACGAC	1396	1402	light responsive
SiLBD22	G-box	TACGTG	1475	1481	light responsive
SiLBD22	CAT-box	GCCACT	1375	1381	meristem expression
SiLBD22	CAT-box	GCCACT	1451	1457	meristem expression
SiLBD22	O2-site	GATGATGTGG	203	213	zein metabolism regulation
SiLBD22	O2-site	GATGATGTGG	621	630	zein metabolism regulation
SiLBD22	G-Box	TCCACATGGCA	1688	1698	light responsive
SiLBD22	GARE-motif	TCTGTTG	584	591	gibberellin responsive
SiLBD22	TATA-box	ATTATA	1021	1027	core promoter element of transcription start
SiLBD22	TATA-box	TATA	1958	1962	core promoter element of transcription start
SiLBD22	TATA-box	TATA	1838	1842	core promoter element of transcription start
SiLBD22	TATA-box	TATATA	1836	1842	core promoter element of transcription start
SiLBD22	TATA-box	TATA	1792	1796	core promoter element of transcription start
SiLBD22	TATA-box	TATA	1570	1574	core promoter element of transcription start
SiLBD22	TATA-box	TATAAA	410	416	core promoter element of transcription start
SiLBD22	TATA-box	TATAA	1022	1027	core promoter element of transcription start
SiLBD22	TATA-box	ATATAA	1579	1585	core promoter element of transcription start
SiLBD22	TATA-box	TATA	414	418	core promoter element of transcription start
SiLBD22	TATA-box	TATAAAA	1567	1574	core promoter element of transcription start
SiLBD22	TATA-box	ATATAT	413	419	core promoter element of transcription start
SiLBD22	TATA-box	ATATAT	301	307	core promoter element of transcription start
SiLBD22	TATA-box	ATATAA	1140	1146	core promoter element of transcription start
SiLBD22	TATA-box	TATATA	412	418	core promoter element of transcription start
SiLBD22	TATA-box	ATATAT	976	982	core promoter element of transcription start
SiLBD22	TATA-box	TATAAA	277	283	core promoter element of transcription start
SiLBD22	TATA-box	TATA	1192	1196	core promoter element of transcription start
SiLBD22	TATA-box	TATAAA	1568	1574	core promoter element of transcription start
SiLBD22	TATA-box	TATATAA	411	418	core promoter element of transcription start
SiLBD22	TATA-box	TATA	251	255	core promoter element of transcription start
SiLBD22	TATA-box	TATA	302	306	core promoter element of transcription start
SiLBD22	TATA-box	TATACA	1790	1796	core promoter element of transcription start
SiLBD22	TATA-box	TATA	977	981	core promoter element of transcription start
SiLBD22	TATA-box	TATAA	1569	1574	core promoter element of transcription start
SiLBD22	TATA-box	ATATAA	250	256	core promoter element of transcription start
SiLBD22	TATA-box	TATA	106	110	core promoter element of transcription start
SiLBD22	TATA-box	TATA	279	283	core promoter element of transcription start
SiLBD22	TATA-box	TATAA	278	283	core promoter element of transcription start
SiLBD22	TATA-box	TATA	1141	1145	core promoter element of transcription start
SiLBD22	TATA-box	TATA	1580	1584	core promoter element of transcription start
SiLBD22	TATA-box	TATTTAAA	304	312	core promoter element of transcription start
SiLBD22	TATA-box	TATAAAA	409	416	core promoter element of transcription start
SiLBD22	TATA-box	TATA	1023	1027	core promoter element of transcription start			TATA-box
SiLBD22	TGACG-motif	TGACG	373	378	MeJA responsive			TATA-box
SiLBD22	TGACG-motif	TGACG	492	497	MeJA responsive			TATA-box
SiLBD22	TGACG-motif	TGACG	1040	1045	MeJA responsive			TATA-box
SiLBD22	TGACG-motif	TGACG	1492	1497	MeJA responsive			TATA-box
SiLBD22	AuxRR-core	GGTCCAT	553	560	auxin responsive
SiLBD22	ACE	GACACGTATG	1473	1483	light responsive
SiLBD22	MBS	CAACTG	828	834	drought inducibility
SiLBD23	TGACG-motif	TGACG	1936	1941	MeJA responsive
SiLBD23	chs-CMA1a	TTACTTAA	846	854	light responsive
SiLBD23	MBS	CAACTG	167	173	drought inducibility
SiLBD23	O2-site	GATGATGTGG	1132	1142	zein metabolism regulation
SiLBD23	G-box	CACGAC	1689	1695	light responsive
SiLBD23	ARE	AAACCA	648	654	meristem expression
SiLBD23	MRE	AACCTAA	676	683	light responsive
SiLBD23	P-box	CCTTTTG	1825	1832	gibberellin responsive
SiLBD23	TATA-box	TATA	1977	1981	core promoter element of transcription start
SiLBD23	TATA-box	ATATAT	1976	1982	core promoter element of transcription start
SiLBD23	TATA-box	TATATA	1975	1981	core promoter element of transcription start
SiLBD23	TATA-box	TATATAA	1974	1981	core promoter element of transcription start
SiLBD23	TATA-box	TATA	1716	1720	core promoter element of transcription start
SiLBD23	TATA-box	TATAA	1715	1720	core promoter element of transcription start
SiLBD23	TATA-box	TATAAA	1973	1979	core promoter element of transcription start
SiLBD23	TATA-box	TATAAAA	1972	1979	core promoter element of transcription start
SiLBD23	TATA-box	TATATA	1485	1491	core promoter element of transcription start
SiLBD23	TATA-box	ATATAT	1486	1492	core promoter element of transcription start
SiLBD23	TATA-box	TATA	1351	1355	core promoter element of transcription start
SiLBD23	TATA-box	ATTATA	1714	1720	core promoter element of transcription start
SiLBD23	TATA-box	TATAA	1709	1714	core promoter element of transcription start
SiLBD23	TATA-box	TATA	1487	1491	core promoter element of transcription start
SiLBD23	TATA-box	TATA	1710	1714	core promoter element of transcription start
SiLBD23	TATA-box	TATTTAAA	1233	1241	core promoter element of transcription start
SiLBD23	TATA-box	TATA	1231	1235	core promoter element of transcription start
SiLBD23	TATA-box	TATA	1180	1184	core promoter element of transcription start
SiLBD23	TATA-box	ATATAT	1230	1236	core promoter element of transcription start
SiLBD23	TATA-box	TATA	630	634	core promoter element of transcription start
SiLBD23	TATA-box	TATATA	375	381	core promoter element of transcription start
SiLBD23	TATA-box	TACAAAA	815	822	core promoter element of transcription start
SiLBD23	TATA-box	TATA	377	381	core promoter element of transcription start
SiLBD23	TATA-box	TATAA	1207	1212	core promoter element of transcription start
SiLBD23	TATA-box	TATA	1208	1212	core promoter element of transcription start
SiLBD23	TATA-box	TATATA	507	513	core promoter element of transcription start
SiLBD23	TATA-box	TATA	1034	1038	core promoter element of transcription start
SiLBD23	TATA-box	ATATAA	1179	1185	core promoter element of transcription start
SiLBD23	TATA-box	TATAAA	1206	1212	core promoter element of transcription start
SiLBD23	TATA-box	TATA	211	215	core promoter element of transcription start
SiLBD23	TATA-box	TATA	509	513	core promoter element of transcription start
SiLBD23	TATA-box	TATAAGAA	503	511	core promoter element of transcription start
SiLBD23	TATA-box	TATATAA	506	513	core promoter element of transcription start
SiLBD23	TATA-box	ATATAA	210	216	core promoter element of transcription start
SiLBD23	TCT-motif	TCTTAC	819	825	light responsive
SiLBD23	TCT-motif	TCTTAC	952	958	light responsive
SiLBD23	TCA-element	CCATCTTTTT	1401	1410	salicylic acid responsive
SiLBD23	TCA-element	CCATCTTTTT	1821	1830	salicylic acid responsive
SiLBD23	GATA-motif	AAGATAAGATT	497	507	light responsive
SiLBD23	AE-box	AGAAACTT	947	955	light responsive
SiLBD23	GA-motif	ATAGATAA	465	473	light responsive
SiLBD23	Box 4	ATTAAT	29	35	light responsive
SiLBD23	CGTCA-motif	CGTCA	1936	1941	MeJA responsive
SiLBD24	Sp1	GGGCGG	1302	1308	light responsive
SiLBD24	ABRE	ACGTG	1146	1151	abscisic acid responsive
SiLBD24	LAMP-element	CTTTATCA	771	779	light responsive
SiLBD24	TCT-motif	TCTTAC	1064	1070	light responsive
SiLBD24	TCT-motif	TCTTAC	1575	1581	light responsive
SiLBD24	P-box	CCTTTTG	1039	1046	gibberellin responsive
SiLBD24	TCA-element	CCATCTTTTT	1617	1626	salicylic acid responsive
SiLBD24	G-box	TACGTG	1146	1152	light responsive
SiLBD24	ARE	AAACCA	1663	1669	meristem expression
SiLBD24	TATA-box	TATATA	831	837	core promoter element of transcription start
SiLBD24	TATA-box	TATTTAAA	735	743	core promoter element of transcription start
SiLBD24	TATA-box	TATATA	829	835	core promoter element of transcription start
SiLBD24	TATA-box	TATA	655	659	core promoter element of transcription start
SiLBD24	TATA-box	TATA	459	463	core promoter element of transcription start
SiLBD24	TATA-box	TATA	568	572	core promoter element of transcription start
SiLBD24	TATA-box	TATAAA	364	370	core promoter element of transcription start
SiLBD24	TATA-box	ATATAT	567	573	core promoter element of transcription start
SiLBD24	TATA-box	TATA	549	553	core promoter element of transcription start
SiLBD24	TATA-box	TATA	524	528	core promoter element of transcription start
SiLBD24	TATA-box	TATA	1879	1883	core promoter element of transcription start
SiLBD24	TATA-box	TATA	1534	1538	core promoter element of transcription start
SiLBD24	TATA-box	TATA	1503	1507	core promoter element of transcription start
SiLBD24	TATA-box	TATA	1254	1258	core promoter element of transcription start
SiLBD24	TATA-box	TATAA	1253	1258	core promoter element of transcription start
SiLBD24	TATA-box	TATAA	523	528	core promoter element of transcription start
SiLBD24	TATA-box	TATA	930	934	core promoter element of transcription start
SiLBD24	TATA-box	TATA	483	487	core promoter element of transcription start
SiLBD24	TATA-box	ATTATA	522	528	core promoter element of transcription start
SiLBD24	TATA-box	ATATAT	830	836	core promoter element of transcription start
SiLBD24	TATA-box	TATA	1282	1286	core promoter element of transcription start
SiLBD24	TATA-box	ATTATA	1252	1258	core promoter element of transcription start
SiLBD24	TATA-box	TATAAA	827	833	core promoter element of transcription start
SiLBD24	TATA-box	TATATA	292	298	core promoter element of transcription start
SiLBD24	TATA-box	TATAA	482	487	core promoter element of transcription start
SiLBD24	TATA-box	TATA	1336	1340	core promoter element of transcription start
SiLBD24	TATA-box	ATTATA	1334	1340	core promoter element of transcription start
SiLBD24	TATA-box	TATA	1680	1684	core promoter element of transcription start
SiLBD24	TATA-box	TATA	475	479	core promoter element of transcription start
SiLBD24	TATA-box	TATATAA	828	835	core promoter element of transcription start
SiLBD24	TATA-box	ATATAT	1679	1685	core promoter element of transcription start
SiLBD24	TATA-box	TATA	833	837	core promoter element of transcription start
SiLBD24	TATA-box	TATA	806	810	core promoter element of transcription start
SiLBD24	TATA-box	TATAA	105	110	core promoter element of transcription start
SiLBD24	TATA-box	TATA	578	582	core promoter element of transcription start
SiLBD24	TATA-box	TATACA	576	582	core promoter element of transcription start
SiLBD24	TATA-box	ATATAT	84	90	core promoter element of transcription start
SiLBD24	TATA-box	TATTTAAA	1134	1142	core promoter element of transcription start
SiLBD24	TATA-box	TATA	20	24	core promoter element of transcription start
SiLBD24	TATA-box	TATA	80	84	core promoter element of transcription start
SiLBD24	TATA-box	TATA	85	89	core promoter element of transcription start
SiLBD24	TATA-box	ATTATA	104	110	core promoter element of transcription start
SiLBD24	TATA-box	TATAAA	473	479	core promoter element of transcription start
SiLBD24	TATA-box	TATAA	474	479	core promoter element of transcription start
SiLBD24	TATA-box	TAAAGATT	774	782	core promoter element of transcription start
SiLBD24	TATA-box	TATA	106	110	core promoter element of transcription start
SiLBD24	TATA-box	TATAA	365	370	core promoter element of transcription start
SiLBD24	TATA-box	TATA	531	535	core promoter element of transcription start
SiLBD24	TATA-box	TATATAA	803	810	core promoter element of transcription start
SiLBD24	TATA-box	ATATAA	79	85	core promoter element of transcription start
SiLBD24	TATA-box	TATA	345	349	core promoter element of transcription start
SiLBD24	TATA-box	ATATAT	929	935	core promoter element of transcription start
SiLBD24	TATA-box	TATAAAT	363	370	core promoter element of transcription start
SiLBD24	TATA-box	TATAA	1335	1340	core promoter element of transcription start
SiLBD24	TATA-box	TATA	294	298	core promoter element of transcription start
SiLBD24	TATA-box	TAAAGATT	369	377	core promoter element of transcription start
SiLBD24	TATA-box	TATA	366	370	core promoter element of transcription start
SiLBD24	TATA-box	taTATAAAtc	825	834	core promoter element of transcription start
SiLBD24	TATA-box	taTATAAAtc	922	931	core promoter element of transcription start
SiLBD24	TATA-box	TATA	1374	1378	core promoter element of transcription start
SiLBD24	TATA-box	TATTTAAA	924	932	core promoter element of transcription start
SiLBD24	TATA-box	TATAAAA	472	479	core promoter element of transcription start
SiLBD24	TATA-box	ATATAA	805	811	core promoter element of transcription start
SiLBD24	TATA-box	TATATA	804	810	core promoter element of transcription start
SiLBD24	TATA-box	TATAAAA	801	808	core promoter element of transcription start
SiLBD24	TATA-box	TATAAAT	826	833	core promoter element of transcription start
SiLBD24	TATA-box	TATAAA	802	808	core promoter element of transcription start
SiLBD24	TCCC-motif	TCTCCCT	1970	1977	light responsive
SiLBD24	chs-CMA1a	TTACTTAA	690	698	light responsive
SiLBD24	GT1-motif	GGTTAAT	649	656	light responsive
SiLBD25	Box 4	ATTAAT	1353	1359	light responsive
SiLBD25	RY-element	CATGCATG	700	708	seed specific regulation
SiLBD25	TCA-element	TCAGAAGAGG	1153	1162	salicylic acid responsive
SiLBD25	GC-motif	CCCCCG	1209	1215	anoxic specific inducibility
SiLBD25	P-box	CCTTTTG	381	388	gibberellin responsive
SiLBD25	TC-rich repeats	ATTCTCTAAC	524	533	defense and stress responsive
SiLBD25	GATT-motif	CTCCTGATTAGC	1267	1278	light responsive
SiLBD25	GATT-motif	CTCCTGATTAGC	1486	1497	light responsive
SiLBD25	CGTCA-motif	CGTCA	463	468	MeJA responsive
SiLBD25	CGTCA-motif	CGTCA	803	808	MeJA responsive
SiLBD25	CGTCA-motif	CGTCA	825	830	MeJA responsive
SiLBD25	CGTCA-motif	CGTCA	1001	1006	MeJA responsive
SiLBD25	CGTCA-motif	CGTCA	1075	1080	MeJA responsive
SiLBD25	ABRE	ACGTG	163	168	abscisic acid responsive
SiLBD25	ABRE	ACGTG	1883	1888	abscisic acid responsive
SiLBD25	Sp1	GGGCGG	497	503	light responsive
SiLBD25	Sp1	GGGCGG	916	922	light responsive
SiLBD25	MBS	CAACTG	1924	1930	drought inducibility
SiLBD25	MBS	CAACTG	1972	1978	drought inducibility
SiLBD25	GT1-motif	GGTTAAT	1041	1048	light responsive
SiLBD25	AuxRR-core	GGTCCAT	2	9	auxin responsive
SiLBD25	TCCC-motif	TCTCCCT	1855	1862	light responsive
SiLBD25	TATA-box	TACAAAA	1461	1468	core promoter element of transcription start
SiLBD25	TATA-box	TATAA	1296	1301	core promoter element of transcription start
SiLBD25	TATA-box	TATA	1297	1301	core promoter element of transcription start
SiLBD25	TATA-box	ATTATA	1295	1301	core promoter element of transcription start
SiLBD25	TGACG-motif	TGACG	463	468	MeJA responsive
SiLBD25	TGACG-motif	TGACG	803	808	MeJA responsive
SiLBD25	TGACG-motif	TGACG	825	830	MeJA responsive
SiLBD25	TGACG-motif	TGACG	1001	1006	MeJA responsive
SiLBD25	TGACG-motif	TGACG	1075	1080	MeJA responsive
SiLBD25	O2-site	GATGATGTGG	1599	1608	zein metabolism regulation
SiLBD25	CAT-box	GCCACT	66	72	meristem expression
SiLBD25	CAT-box	GCCACT	1977	1983	meristem expression
SiLBD25	G-box	TACGTG	162	168	light responsive
SiLBD25	G-box	CACGAC	925	931	light responsive
SiLBD25	G-box	TACGTG	1882	1888	light responsive
SiLBD26	RY-element	CATGCATG	1779	1787	seed specific regulation
SiLBD26	TCT-motif	TCTTAC	1817	1823	light responsive
SiLBD26	TCA-element	CCATCTTTTT	349	358	salicylic acid responsive
SiLBD26	CGTCA-motif	CGTCA	284	289	MeJA responsive
SiLBD26	CGTCA-motif	CGTCA	393	398	MeJA responsive
SiLBD26	CGTCA-motif	CGTCA	1837	1842	MeJA responsive
SiLBD26	Sp1	GGGCGG	831	837	light responsive
SiLBD26	ABRE	CACGTG	31	37	abscisic acid responsive
SiLBD26	ABRE	ACGTG	32	37	abscisic acid responsive
SiLBD26	ABRE	ACGTG	454	459	abscisic acid responsive
SiLBD26	ABRE	ACGTG	547	552	abscisic acid responsive
SiLBD26	MBS	CAACTG	516	522	drought inducibility
SiLBD26	MBS	CAACTG	1170	1176	drought inducibility
SiLBD26	TCCC-motif	TCTCCCT	1613	1620	light responsive
SiLBD26	ACE	GACACGTATG	1934	1943	light responsive
SiLBD26	TATA-box	TATAA	1958	1963	core promoter element of transcription start
SiLBD26	TATA-box	TATA	1301	1305	core promoter element of transcription start
SiLBD26	TATA-box	TACAAAA	1906	1913	core promoter element of transcription start
SiLBD26	TATA-box	TATA	608	612	core promoter element of transcription start
SiLBD26	TATA-box	TATATA	1090	1096	core promoter element of transcription start
SiLBD26	TATA-box	TATA	1092	1096	core promoter element of transcription start
SiLBD26	TATA-box	TATA	1646	1650	core promoter element of transcription start
SiLBD26	TATA-box	TATA	260	264	core promoter element of transcription start
SiLBD26	TATA-box	TATA	151	155	core promoter element of transcription start
SiLBD26	TATA-box	TACAAAA	7	14	core promoter element of transcription start
SiLBD26	TATA-box	TATAAA	1957	1963	core promoter element of transcription start
SiLBD26	TATA-box	ATATAT	1089	1095	core promoter element of transcription start
SiLBD26	TATA-box	TACAAAA	712	719	core promoter element of transcription start
SiLBD26	TATA-box	ATATAT	1091	1097	core promoter element of transcription start
SiLBD26	TATA-box	TATAAAA	1956	1963	core promoter element of transcription start
SiLBD26	TATA-box	TATA	1407	1411	core promoter element of transcription start
SiLBD26	TATA-box	TATA	1745	1749	core promoter element of transcription start
SiLBD26	TATA-box	TATA	1959	1963	core promoter element of transcription start
SiLBD26	TGACG-motif	TGACG	284	289	MeJA responsive
SiLBD26	TGACG-motif	TGACG	393	398	MeJA responsive
SiLBD26	TGACG-motif	TGACG	1837	1842	MeJA responsive
SiLBD26	MBSI	TTTTTACGGTTA	1310	1321	flavonoid biosynthetic genes regulation
SiLBD26	G-Box	CACGTG	31	37	light responsive
SiLBD26	G-Box	CACGTT	454	460	light responsive
SiLBD26	G-Box	CACGTT	547	553	light responsive
SiLBD26	CAT-box	GCCACT	599	605	meristem expression
SiLBD26	CAT-box	GCCACT	1912	1918	meristem expression
SiLBD26	G-box	CACGTG	31	37	light responsive
SiLBD27	ABRE	ACGTG	85	90	abscisic acid responsive
SiLBD27	ABRE	ACGTG	1366	1371	abscisic acid responsive
SiLBD27	Sp1	GGGCGG	521	527	light responsive
SiLBD27	Sp1	GGGCGG	1907	1913	light responsive
SiLBD27	CGTCA-motif	CGTCA	1244	1249	MeJA responsive
SiLBD27	TATA-box	TATATA	1330	1336	core promoter element of transcription start
SiLBD27	TATA-box	TATATA	1326	1332	core promoter element of transcription start
SiLBD27	TATA-box	ATTATA	1320	1326	core promoter element of transcription start
SiLBD27	TATA-box	ATATAT	1323	1329	core promoter element of transcription start
SiLBD27	TATA-box	TATA	934	938	core promoter element of transcription start
SiLBD27	TATA-box	ATATAT	933	939	core promoter element of transcription start
SiLBD27	TATA-box	TATA	900	904	core promoter element of transcription start
SiLBD27	TATA-box	TATA	816	820	core promoter element of transcription start
SiLBD27	TATA-box	TATATA	1328	1334	core promoter element of transcription start
SiLBD27	TATA-box	TATATAA	1321	1328	core promoter element of transcription start
SiLBD27	TATA-box	TATA	372	376	core promoter element of transcription start
SiLBD27	TATA-box	TATA	1332	1336	core promoter element of transcription start
SiLBD27	TATA-box	TATATA	1322	1328	core promoter element of transcription start
SiLBD27	TATA-box	ATATAT	1327	1333	core promoter element of transcription start
SiLBD27	TATA-box	TATATA	1324	1330	core promoter element of transcription start
SiLBD27	TATA-box	ATATAT	1331	1337	core promoter element of transcription start
SiLBD27	TATA-box	ATATAT	1329	1335	core promoter element of transcription start
SiLBD27	TATA-box	TATA	1350	1354	core promoter element of transcription start
SiLBD27	TATA-box	TATA	1620	1624	core promoter element of transcription start
SiLBD27	TATA-box	ATATAT	1325	1331	core promoter element of transcription start
SiLBD27	TC-rich repeats	GTTTTCTTAC	1378	1387	defense and stress responsive
SiLBD27	TCA-element	TCAGAAGAGG	643	652	salicylic acid responsive
SiLBD27	GC-motif	CCCCCG	415	421	anoxic specific inducibility
SiLBD27	GC-motif	CCCCCG	1917	1923	anoxic specific inducibility
SiLBD27	P-box	CCTTTTG	21	28	gibberellin responsive
SiLBD27	P-box	CCTTTTG	378	385	gibberellin responsive
SiLBD27	TGA-element	AACGAC	1946	1952	auxin responsive
SiLBD27	GATA-motif	GATAGGA	461	468	light responsive
SiLBD27	GATA-motif	AAGGATAAGG	850	859	light responsive
SiLBD27	ATCT-motif	AATCTAATCC	484	493	light responsive
SiLBD27	CAT-box	GCCACT	985	991	meristem expression
SiLBD27	CAT-box	GCCACT	1290	1296	meristem expression
SiLBD27	CAT-box	GCCACT	1798	1804	meristem expression
SiLBD27	G-box	TACGTG	84	90	light responsive
SiLBD27	G-box	TACGTG	1366	1372	light responsive
SiLBD27	ARE	AAACCA	743	749	meristem expression
SiLBD27	ARE	AAACCA	1592	1598	meristem expression
SiLBD27	ATC-motif	AGCTATCCA	637	646	light responsive
SiLBD27	ATC-motif	AGTAATCT	768	776	light responsive
SiLBD27	TGACG-motif	TGACG	1244	1249	MeJA responsive
SiLBD27	I-box	cGATAAGGCG	53	62	light responsive
SiLBD27	LTR	CCGAAA	52	58	low-temperature responsive
SiLBD27	circadian	CAAAGATATC	833	842	circadian control
SiLBD27	GT1-motif	GGTTAA	866	872	light responsive
SiLBD27	GT1-motif	GGTTAAT	1142	1149	light responsive
SiLBD28	MBS	CAACTG	1400	1406	drought inducibility
SiLBD28	GT1-motif	GGTTAA	148	154	light responsive
SiLBD28	GT1-motif	GGTTAA	1498	1504	light responsive
SiLBD28	I-box	GTATAAGGCC	1688	1697	light responsive
SiLBD28	TATA-box	ATATAT	533	539	core promoter element of transcription start
SiLBD28	TATA-box	TATA	297	301	core promoter element of transcription start
SiLBD28	TATA-box	TATAA	296	301	core promoter element of transcription start
SiLBD28	TATA-box	TATATA	532	538	core promoter element of transcription start
SiLBD28	TATA-box	TATA	506	510	core promoter element of transcription start
SiLBD28	TATA-box	ATATAA	373	379	core promoter element of transcription start
SiLBD28	TATA-box	TATA	77	81	core promoter element of transcription start
SiLBD28	TATA-box	TATA	271	275	core promoter element of transcription start
SiLBD28	TATA-box	TATACA	269	275	core promoter element of transcription start
SiLBD28	TATA-box	TATACA	775	781	core promoter element of transcription start
SiLBD28	TATA-box	ATATAT	76	82	core promoter element of transcription start
SiLBD28	TATA-box	TATA	777	781	core promoter element of transcription start
SiLBD28	TATA-box	TATAA	127	132	core promoter element of transcription start
SiLBD28	TATA-box	TATATA	370	376	core promoter element of transcription start
SiLBD28	TATA-box	ATATAT	371	377	core promoter element of transcription start
SiLBD28	TATA-box	ATTATA	295	301	core promoter element of transcription start
SiLBD28	TATA-box	TATA	524	528	core promoter element of transcription start
SiLBD28	TATA-box	TATA	155	159	core promoter element of transcription start
SiLBD28	TATA-box	ATATAT	531	537	core promoter element of transcription start
SiLBD28	TATA-box	TATATA	372	378	core promoter element of transcription start
SiLBD28	TATA-box	TATATA	75	81	core promoter element of transcription start
SiLBD28	TATA-box	TATAA	1292	1297	core promoter element of transcription start
SiLBD28	TATA-box	TATACA	368	374	core promoter element of transcription start
SiLBD28	TATA-box	ATATAT	1215	1221	core promoter element of transcription start
SiLBD28	TATA-box	TATA	1259	1263	core promoter element of transcription start
SiLBD28	TATA-box	TATA	1957	1961	core promoter element of transcription start
SiLBD28	TATA-box	TATATA	1955	1961	core promoter element of transcription start
SiLBD28	TATA-box	ATATAT	1954	1960	core promoter element of transcription start
SiLBD28	TATA-box	TATATA	1953	1959	core promoter element of transcription start
SiLBD28	TATA-box	ATTATA	1291	1297	core promoter element of transcription start
SiLBD28	TATA-box	TATA	1193	1197	core promoter element of transcription start
SiLBD28	TATA-box	TATA	1216	1220	core promoter element of transcription start
SiLBD28	TATA-box	TATATA	1191	1197	core promoter element of transcription start
SiLBD28	TATA-box	TATA	804	808	core promoter element of transcription start
SiLBD28	TATA-box	TATA	847	851	core promoter element of transcription start
SiLBD28	TATA-box	TACAAAA	1421	1428	core promoter element of transcription start
SiLBD28	TATA-box	TATAAAA	1256	1263	core promoter element of transcription start
SiLBD28	TATA-box	ATATAA	1192	1198	core promoter element of transcription start
SiLBD28	TATA-box	TATA	1551	1555	core promoter element of transcription start
SiLBD28	TATA-box	TATAAA	1257	1263	core promoter element of transcription start
SiLBD28	TATA-box	ATATAA	803	809	core promoter element of transcription start
SiLBD28	TATA-box	TATATA	530	536	core promoter element of transcription start
SiLBD28	TATA-box	TATA	128	132	core promoter element of transcription start
SiLBD28	TATA-box	TATA	1293	1297	core promoter element of transcription start
SiLBD28	TATA-box	TATA	534	538	core promoter element of transcription start
SiLBD28	TATA-box	TATAA	1258	1263	core promoter element of transcription start
SiLBD28	TATA-box	TATA	374	378	core promoter element of transcription start
SiLBD28	TATA-box	TATA	1430	1434	core promoter element of transcription start
SiLBD28	TATA-box	TATACA	845	851	core promoter element of transcription start
SiLBD28	TGACG-motif	TGACG	165	170	MeJA responsive
SiLBD28	TGACG-motif	TGACG	910	915	MeJA responsive
SiLBD28	TGACG-motif	TGACG	1312	1317	MeJA responsive
SiLBD28	ATC-motif	TGCTATCCG	580	589	light responsive
SiLBD28	ARE	AAACCA	652	658	meristem expression
SiLBD28	CAT-box	GCCACT	951	957	meristem expression
SiLBD28	G-box	TACGTG	715	721	light responsive
SiLBD28	G-box	CACGTC	926	932	light responsive
SiLBD28	G-box	CACGAC	1249	1255	light responsive
SiLBD28	Box 4	ATTAAT	1266	1272	light responsive
SiLBD28	GATA-motif	AAGATAAGATT	1082	1092	light responsive
SiLBD28	TGA-element	AACGAC	1155	1161	auxin responsive
SiLBD28	P-box	CCTTTTG	1359	1366	gibberellin responsive
SiLBD28	CGTCA-motif	CGTCA	165	170	MeJA responsive
SiLBD28	CGTCA-motif	CGTCA	910	915	MeJA responsive
SiLBD28	CGTCA-motif	CGTCA	1312	1317	MeJA responsive
SiLBD28	ABRE	ACGTG	715	720	abscisic acid responsive
SiLBD28	ABRE	ACGTG	927	932	abscisic acid responsive
SiLBD29	ARE	AAACCA	184	190	meristem expression
SiLBD29	ARE	AAACCA	206	212	meristem expression
SiLBD29	G-Box	CACGTT	1106	1112	light responsive
SiLBD29	G-Box	CACGTT	1507	1513	light responsive
SiLBD29	G-box	CACGTC	337	343	light responsive
SiLBD29	G-box	TACGTG	817	823	light responsive
SiLBD29	G-box	CACGTC	881	887	light responsive
SiLBD29	G-box	CACGTC	1436	1442	light responsive
SiLBD29	G-box	CACGTC	1872	1878	light responsive
SiLBD29	O2-site	GTTGACGTGA	221	230	zein metabolism regulation
SiLBD29	O2-site	GTTGACGTGA	814	823	zein metabolism regulation
SiLBD29	O2-site	GATGA(C/T)(A/G)TG(A/G)	1033	1041	zein metabolism regulation
SiLBD29	TCCC-motif	TCTCCCT	681	688	light responsive
SiLBD29	TCCC-motif	TCTCCCT	1959	1966	light responsive
SiLBD29	TATA-box	TATA	36	40	core promoter element of transcription start
SiLBD29	TATA-box	TATA	1955	1959	core promoter element of transcription start
SiLBD29	TATA-box	TATA	27	31	core promoter element of transcription start
SiLBD29	TATA-box	ATATAT	1954	1960	core promoter element of transcription start
SiLBD29	TATA-box	TATAA	26	31	core promoter element of transcription start
SiLBD29	TATA-box	TAAAGATT	518	526	core promoter element of transcription start
SiLBD29	TATA-box	TATA	441	445	core promoter element of transcription start
SiLBD29	TATA-box	TATAAA	25	31	core promoter element of transcription start
SiLBD29	TATA-box	ATTATA	1240	1246	core promoter element of transcription start
SiLBD29	TATA-box	TATAA	1241	1246	core promoter element of transcription start
SiLBD29	TATA-box	TATATA	1953	1959	core promoter element of transcription start
SiLBD29	TATA-box	TATA	1242	1246	core promoter element of transcription start
SiLBD29	TGACG-motif	TGACG	223	228	MeJA responsive
SiLBD29	TGACG-motif	TGACG	339	344	MeJA responsive
SiLBD29	TGACG-motif	TGACG	547	552	MeJA responsive
SiLBD29	TGACG-motif	TGACG	586	591	MeJA responsive
SiLBD29	TGACG-motif	TGACG	1353	1358	MeJA responsive
SiLBD29	WUN-motif	AAATTTCCT	1651	1660	wound-responsive element
SiLBD29	Sp1	GGGCGG	706	712	light responsive
SiLBD29	Sp1	GGGCGG	802	808	light responsive
SiLBD29	Sp1	GGGCGG	1799	1805	light responsive
SiLBD29	ABRE	ACGTG	337	342	abscisic acid responsive
SiLBD29	ABRE	ACGTG	818	823	abscisic acid responsive
SiLBD29	ABRE	ACGTG	882	887	abscisic acid responsive
SiLBD29	ABRE	ACGTG	1106	1111	abscisic acid responsive
SiLBD29	ABRE	CGTACGTGCA	1412	1421	abscisic acid responsive
SiLBD29	ABRE	ACGTG	1436	1441	abscisic acid responsive
SiLBD29	ABRE	ACGTG	1507	1512	abscisic acid responsive
SiLBD29	ABRE	ACGTG	1872	1877	abscisic acid responsive
SiLBD29	CGTCA-motif	CGTCA	223	228	MeJA responsive
SiLBD29	CGTCA-motif	CGTCA	339	344	MeJA responsive
SiLBD29	CGTCA-motif	CGTCA	547	552	MeJA responsive
SiLBD29	CGTCA-motif	CGTCA	586	591	MeJA responsive
SiLBD29	CGTCA-motif	CGTCA	1353	1358	MeJA responsive
SiLBD29	GC-motif	CCCCCG	805	811	anoxic specific inducibility
SiLBD29	GC-motif	CCCCCG	1802	1808	anoxic specific inducibility
SiLBD29	Box 4	ATTAAT	502	508	light responsive
SiLBD29	AE-box	AGAAACAA	313	321	light responsive
SiLBD29	ATCT-motif	AATCTAATCC	505	514	light responsive
SiLBD3	G-box	CACGTC	456	462	light responsive
SiLBD3	G-box	CACGAC	484	490	light responsive
SiLBD3	G-box	CACGAC	1248	1254	light responsive
SiLBD3	G-box	CACGTC	1441	1447	light responsive
SiLBD3	G-box	CACGAC	1787	1793	light responsive
SiLBD3	CAT-box	GCCACT	584	590	meristem expression
SiLBD3	CAT-box	GCCACT	782	788	meristem expression
SiLBD3	MBS	CAACTG	1843	1849	drought inducibility
SiLBD3	I-box	gGATAAGGTG	749	758	light responsive
SiLBD3	I-box	atGATAAGGTC	1519	1529	light responsive
SiLBD3	TATA-box	TATAA	1656	1661	core promoter element of transcription start
SiLBD3	TATA-box	TATAAA	1655	1661	core promoter element of transcription start
SiLBD3	TATA-box	TATAAAT	1654	1661	core promoter element of transcription start
SiLBD3	TATA-box	TATA	1657	1661	core promoter element of transcription start
SiLBD3	TATA-box	TATAAATA	1653	1661	core promoter element of transcription start
SiLBD3	TGACG-motif	TGACG	11	16	MeJA responsive
SiLBD3	TGACG-motif	TGACG	1406	1411	MeJA responsive
SiLBD3	TGACG-motif	TGACG	1423	1428	MeJA responsive
SiLBD3	CGTCA-motif	CGTCA	11	16	MeJA responsive
SiLBD3	CGTCA-motif	CGTCA	1406	1411	MeJA responsive
SiLBD3	CGTCA-motif	CGTCA	1423	1428	MeJA responsive
SiLBD3	ABRE	ACGTG	457	462	abscisic acid responsive
SiLBD3	ABRE	ACGTG	1442	1447	abscisic acid responsive
SiLBD3	ABRE	GCCGCGTGGC	1467	1476	abscisic acid responsive
SiLBD3	Sp1	GGGCGG	807	813	light responsive
SiLBD3	GATA-motif	GATAGGA	186	193	light responsive
SiLBD3	TGA-element	AACGAC	270	276	auxin responsive
SiLBD3	GCN4_motif	TGAGTCA	793	800	endosperm expression
SiLBD30	G-box	CACGAC	353	359	light responsive
SiLBD30	G-box	CACGTC	468	474	light responsive
SiLBD30	G-box	TACGTG	1438	1444	light responsive
SiLBD30	G-box	CACGTC	1719	1725	light responsive
SiLBD30	G-box	CACGTC	1937	1943	light responsive
SiLBD30	GARE-motif	TCTGTTG	289	296	gibberellin responsive
SiLBD30	CGTCA-motif	CGTCA	603	608	MeJA responsive
SiLBD30	CGTCA-motif	CGTCA	1840	1845	MeJA responsive
SiLBD30	TC-rich repeats	GTTTTCTTAC	1632	1641	defense and stress responsive
SiLBD30	Unnamed_1	GGATTTTACAGT	70	81	phytochrome
SiLBD30	TGA-element	AACGAC	186	192	auxin responsive
SiLBD30	RY-element	CATGCATG	903	911	seed specific regulation
SiLBD30	G-Box	TCCACATGGCA	44	54	light responsive
SiLBD30	ARE	AAACCA	1489	1495	meristem expression
SiLBD30	ARE	AAACCA	1603	1609	meristem expression
SiLBD30	TATA-box	TATATA	1957	1963	core promoter element of transcription start
SiLBD30	TATA-box	TATA	1961	1965	core promoter element of transcription start
SiLBD30	TATA-box	TATATA	1142	1148	core promoter element of transcription start
SiLBD30	TATA-box	ATATAT	1141	1147	core promoter element of transcription start
SiLBD30	TATA-box	TATATA	1959	1965	core promoter element of transcription start
SiLBD30	TATA-box	ATATAT	1958	1964	core promoter element of transcription start
SiLBD30	TATA-box	TATA	1916	1920	core promoter element of transcription start
SiLBD30	TATA-box	TATA	1658	1662	core promoter element of transcription start
SiLBD30	TATA-box	TATA	1157	1161	core promoter element of transcription start
SiLBD30	TATA-box	TATA	1883	1887	core promoter element of transcription start
SiLBD30	TATA-box	TATA	752	756	core promoter element of transcription start
SiLBD30	TATA-box	TATAA	1048	1053	core promoter element of transcription start
SiLBD30	TATA-box	TATA	1015	1019	core promoter element of transcription start
SiLBD30	TATA-box	TATA	1144	1148	core promoter element of transcription start
SiLBD30	TATA-box	ATATAT	751	757	core promoter element of transcription start
SiLBD30	TATA-box	TATA	142	146	core promoter element of transcription start
SiLBD30	TATA-box	TATA	1707	1711	core promoter element of transcription start
SiLBD30	TATA-box	TATA	969	973	core promoter element of transcription start
SiLBD30	TATA-box	TACAAAA	1606	1613	core promoter element of transcription start
SiLBD30	TATA-box	TACAAAA	328	335	core promoter element of transcription start
SiLBD30	TATA-box	TATAA	141	146	core promoter element of transcription start
SiLBD30	TATA-box	TATA	1049	1053	core promoter element of transcription start
SiLBD30	TATA-box	TATA	135	139	core promoter element of transcription start
SiLBD30	TGACG-motif	TGACG	603	608	MeJA responsive
SiLBD30	TGACG-motif	TGACG	1840	1845	MeJA responsive
SiLBD30	I-box	cCATATCCAAT	501	511	light responsive
SiLBD30	I-box	cCATATCCAAT	807	817	light responsive
SiLBD30	MBS	CAACTG	57	63	drought inducibility
SiLBD30	MBS	CAACTG	1815	1821	drought inducibility
SiLBD30	GT1-motif	GGTTAA	1700	1706	light responsive
SiLBD30	GT1-motif	GGTTAAT	1731	1738	light responsive
SiLBD30	GT1-motif	GGTTAA	1732	1738	light responsive
SiLBD30	Sp1	GGGCGG	432	438	light responsive
SiLBD30	ABRE	ACGTG	469	474	abscisic acid responsive
SiLBD30	ABRE	ACGTG	1439	1444	abscisic acid responsive
SiLBD30	ABRE	ACGTG	1719	1724	abscisic acid responsive
SiLBD30	ABRE	ACGTG	1937	1942	abscisic acid responsive
SiLBD30	LAMP-element	CTTTATCA	111	119	light responsive
SiLBD30	TCT-motif	TCTTAC	1422	1428	light responsive
SiLBD30	GATA-motif	GATAGGA	744	751	light responsive
SiLBD30	Box 4	ATTAAT	1727	1733	light responsive
SiLBD31	I-box	TGATAATGT	407	416	light responsive
SiLBD31	TCCC-motif	TCTCCCT	1410	1417	light responsive
SiLBD31	TCCC-motif	TCTCCCT	1562	1569	light responsive
SiLBD31	TATA-box	TATAA	1261	1266	core promoter element of transcription start
SiLBD31	TATA-box	TATAAA	1260	1266	core promoter element of transcription start
SiLBD31	TATA-box	TATA	595	599	core promoter element of transcription start
SiLBD31	TATA-box	TATA	1262	1266	core promoter element of transcription start
SiLBD31	TATA-box	TATA	330	334	core promoter element of transcription start
SiLBD31	TATA-box	TATA	322	326	core promoter element of transcription start
SiLBD31	TATA-box	TACAAAA	1000	1007	core promoter element of transcription start
SiLBD31	TATA-box	TATAAAA	1259	1266	core promoter element of transcription start
SiLBD31	TATA-box	TATA	1025	1029	core promoter element of transcription start
SiLBD31	TATA-box	TATAA	1801	1806	core promoter element of transcription start
SiLBD31	TATA-box	TATACA	326	332	core promoter element of transcription start
SiLBD31	TATA-box	TATA	1958	1962	core promoter element of transcription start
SiLBD31	TATA-box	TATATA	328	334	core promoter element of transcription start
SiLBD31	TATA-box	ATATAT	321	327	core promoter element of transcription start
SiLBD31	TATA-box	TATATA	320	326	core promoter element of transcription start
SiLBD31	TATA-box	ATATAA	291	297	core promoter element of transcription start
SiLBD31	TATA-box	TATA	1802	1806	core promoter element of transcription start
SiLBD31	TATA-box	TATA	292	296	core promoter element of transcription start
SiLBD31	TATA-box	ATATAT	329	335	core promoter element of transcription start
SiLBD31	TGACG-motif	TGACG	271	276	MeJA responsive
SiLBD31	TGACG-motif	TGACG	447	452	MeJA responsive
SiLBD31	TGACG-motif	TGACG	729	734	MeJA responsive
SiLBD31	GT1-motif	GGTTAA	159	165	light responsive
SiLBD31	LTR	CCGAAA	170	176	low-temperature responsive
SiLBD31	C-box	ACGAGCACCGCC	141	152	light responsive
SiLBD31	MBS	CAACTG	559	565	drought inducibility
SiLBD31	G-Box	CACGTG	1360	1366	light responsive
SiLBD31	CAT-box	GCCACT	590	596	meristem expression
SiLBD31	CAT-box	GCCACT	1384	1390	meristem expression
SiLBD31	G-box	TACGTG	312	318	light responsive
SiLBD31	G-box	CACGTC	566	572	light responsive
SiLBD31	G-box	CACGTC	584	590	light responsive
SiLBD31	G-box	TACGTG	656	662	light responsive
SiLBD31	G-box	CACGTG	1360	1366	light responsive
SiLBD31	TGA-element	AACGAC	151	157	auxin responsive
SiLBD31	P-box	CCTTTTG	1898	1905	gibberellin responsive
SiLBD31	GC-motif	CCCCCG	1514	1520	anoxic specific inducibility
SiLBD31	GC-motif	CCCCCG	1675	1681	anoxic specific inducibility
SiLBD31	Box 4	ATTAAT	296	302	light responsive
SiLBD31	Box 4	ATTAAT	1109	1115	light responsive
SiLBD31	Box 4	ATTAAT	1817	1823	light responsive
SiLBD31	motif I	gGTACGTGGCG	564	574	root specific
SiLBD31	Sp1	GGGCGG	741	747	light responsive
SiLBD31	ABRE	CGTACGTGCA	310	320	abscisic acid responsive
SiLBD31	ABRE	ACGTG	312	317	abscisic acid responsive
SiLBD31	ABRE	ACGTG	567	572	abscisic acid responsive
SiLBD31	ABRE	ACGTG	584	589	abscisic acid responsive
SiLBD31	ABRE	ACGTG	657	662	abscisic acid responsive
SiLBD31	ABRE	GCCGCGTGGC	800	809	abscisic acid responsive
SiLBD31	ABRE	CACGTG	1360	1366	abscisic acid responsive
SiLBD31	ABRE	ACGTG	1361	1366	abscisic acid responsive
SiLBD31	CGTCA-motif	CGTCA	271	276	MeJA responsive
SiLBD31	CGTCA-motif	CGTCA	447	452	MeJA responsive
SiLBD31	CGTCA-motif	CGTCA	729	734	MeJA responsive
SiLBD31	GATT-motif	CTCCTGATTAGC	1284	1295	light responsive
SiLBD32	ABRE	ACGTG	839	844	abscisic acid responsive
SiLBD32	ABRE	ACGTG	1642	1647	abscisic acid responsive
SiLBD32	GATT-motif	CTCCTGATTAGC	588	599	light responsive
SiLBD32	HD-Zip 1	CAAT(A/T)ATTG	1866	1874	differentiation of the palisade mesophyll cells
SiLBD32	TCT-motif	TCTTAC	320	326	light responsive
SiLBD32	TCT-motif	TCTTAC	659	665	light responsive
SiLBD32	P-box	CCTTTTG	719	726	gibberellin responsive
SiLBD32	GC-motif	CCCCCG	1712	1718	anoxic specific inducibility
SiLBD32	Box 4	ATTAAT	45	51	light responsive
SiLBD32	Box 4	ATTAAT	55	61	light responsive
SiLBD32	Box 4	ATTAAT	749	755	light responsive
SiLBD32	TATA-box	TATAA	1475	1480	core promoter element of transcription start
SiLBD32	TATA-box	TATA	1352	1356	core promoter element of transcription start
SiLBD32	TATA-box	TAAAGATT	1856	1864	core promoter element of transcription start
SiLBD32	TATA-box	TATA	265	269	core promoter element of transcription start
SiLBD32	TATA-box	TATA	166	170	core promoter element of transcription start
SiLBD32	TATA-box	TATAA	165	170	core promoter element of transcription start
SiLBD32	TATA-box	ATTATA	1474	1480	core promoter element of transcription start
SiLBD32	TATA-box	TATA	636	640	core promoter element of transcription start
SiLBD32	TATA-box	TATA	953	957	core promoter element of transcription start
SiLBD32	TATA-box	TATA	5	9	core promoter element of transcription start
SiLBD32	TATA-box	TATA	177	181	core promoter element of transcription start
SiLBD32	TATA-box	TATA	1476	1480	core promoter element of transcription start
SiLBD32	TATA-box	TATA	705	709	core promoter element of transcription start
SiLBD32	TATA-box	TATAA	704	709	core promoter element of transcription start
SiLBD32	TATA-box	TATAAAA	163	170	core promoter element of transcription start
SiLBD32	TATA-box	TATAAA	164	170	core promoter element of transcription start
SiLBD32	TATA-box	ATATAT	4	10	core promoter element of transcription start
SiLBD32	Box 4	ATTAAT	1953	1959	light responsive
SiLBD32	O2-site	GATGACATGG	1064	1073	zein metabolism regulation
SiLBD32	G-box	CACGTC	1642	1648	light responsive
SiLBD32	G-Box	CACGTT	839	845	light responsive
SiLBD32	Box II	ACACGTTGT	838	847	light responsive
SiLBD32	LTR	CCGAAA	1689	1695	low-temperature responsive
SiLBD32	MBS	CAACTG	354	360	drought inducibility
SiLBD32	MBS	CAACTG	1724	1730	drought inducibility
SiLBD32	MBS	CAACTG	1763	1769	drought inducibility
SiLBD33	MRE	AACCTAA	905	912	light responsive
SiLBD33	ARE	AAACCA	32	38	meristem expression
SiLBD33	ARE	AAACCA	1369	1375	meristem expression
SiLBD33	G-box	TACGTG	434	440	light responsive
SiLBD33	G-box	TACGTG	636	642	light responsive
SiLBD33	G-box	CACGTC	1231	1237	light responsive
SiLBD33	G-box	TACGTG	1373	1379	light responsive
SiLBD33	G-box	CACGAC	1513	1519	light responsive
SiLBD33	G-box	TACGTG	1556	1562	light responsive
SiLBD33	G-box	TACGTG	1725	1731	light responsive
SiLBD33	MBS	CAACTG	816	822	drought inducibility
SiLBD33	I-box	gGATAAGGTG	554	563	light responsive
SiLBD33	I-box	gGATAAGGTG	1565	1574	light responsive
SiLBD33	TATA-box	TATA	875	879	core promoter element of transcription start
SiLBD33	TATA-box	TATA	1149	1153	core promoter element of transcription start
SiLBD33	TATA-box	TATA	106	110	core promoter element of transcription start
SiLBD33	TATA-box	ATTATA	912	918	core promoter element of transcription start
SiLBD33	TATA-box	TATAA	1148	1153	core promoter element of transcription start
SiLBD33	TATA-box	TATAA	913	918	core promoter element of transcription start
SiLBD33	TATA-box	TATAAA	104	110	core promoter element of transcription start
SiLBD33	TATA-box	TACAAAA	68	75	core promoter element of transcription start
SiLBD33	TATA-box	TATAA	105	110	core promoter element of transcription start
SiLBD33	TATA-box	TATA	914	918	core promoter element of transcription start
SiLBD33	TGACG-motif	TGACG	1230	1235	MeJA responsive
SiLBD33	TGACG-motif	TGACG	1423	1428	MeJA responsive
SiLBD33	Gap-box	CAAATGAA(A/G)A	504	513.5	light responsive
SiLBD33	CGTCA-motif	CGTCA	1230	1235	MeJA responsive
SiLBD33	CGTCA-motif	CGTCA	1423	1428	MeJA responsive
SiLBD33	Sp1	GGGCGG	687	693	light responsive
SiLBD33	AT1-motif	AATTATTTTTTATT	977	990	light responsive
SiLBD33	ABRE	CGTACGTGCA	432	441	abscisic acid responsive
SiLBD33	ABRE	ACGTG	434	439	abscisic acid responsive
SiLBD33	ABRE	ACGTG	637	642	abscisic acid responsive
SiLBD33	ABRE	ACGTG	1232	1237	abscisic acid responsive
SiLBD33	ABRE	ACGTG	1373	1378	abscisic acid responsive
SiLBD33	ABRE	ACGTG	1556	1561	abscisic acid responsive
SiLBD33	ABRE	ACGTG	1726	1731	abscisic acid responsive
SiLBD33	Box 4	ATTAAT	755	761	light responsive
SiLBD33	Box 4	ATTAAT	926	932	light responsive
SiLBD33	Box 4	ATTAAT	1029	1035	light responsive
SiLBD33	GCN4_motif	TGAGTCA	787	794	endosperm expression
SiLBD33	GC-motif	CCCCCG	395	401	anoxic specific inducibility
SiLBD4	TATA-box	TATA	1713	1717	core promoter element of transcription start
SiLBD4	TATA-box	TATATA	1711	1717	core promoter element of transcription start
SiLBD4	TATA-box	TATA	1706	1710	core promoter element of transcription start
SiLBD4	TATA-box	ATATAA	1712	1718	core promoter element of transcription start
SiLBD4	TATA-box	ATATAT	1710	1716	core promoter element of transcription start
SiLBD4	TATA-box	ATATAA	1705	1711	core promoter element of transcription start
SiLBD4	TATA-box	TATATAA	1703	1710	core promoter element of transcription start
SiLBD4	TATA-box	TATA	1239	1243	core promoter element of transcription start
SiLBD4	TATA-box	TATATTTATATTT	1230	1242	core promoter element of transcription start
SiLBD4	TATA-box	TATA	676	680	core promoter element of transcription start
SiLBD4	TATA-box	ATATAT	223	229	core promoter element of transcription start
SiLBD4	TATA-box	TATATA	1704	1710	core promoter element of transcription start
SiLBD4	TATA-box	TACAAAA	1622	1629	core promoter element of transcription start
SiLBD4	TATA-box	TATA	224	228	core promoter element of transcription start
SiLBD4	TATA-box	TATAAGAA	1700	1708	core promoter element of transcription start
SiLBD4	TATA-box	TATA	1391	1395	core promoter element of transcription start
SiLBD4	TGACG-motif	TGACG	809	814	MeJA responsive
SiLBD4	TGACG-motif	TGACG	1012	1017	MeJA responsive
SiLBD4	TGACG-motif	TGACG	1299	1304	MeJA responsive
SiLBD4	I-box	AGATAAGG	640	648	light responsive
SiLBD4	TCCC-motif	TCTCCCT	636	643	light responsive
SiLBD4	G-box	CACGTC	1187	1193	light responsive
SiLBD4	G-box	CACGTG	1293	1299	light responsive
SiLBD4	G-box	CACGTC	1300	1306	light responsive
SiLBD4	G-box	CACGTG	1785	1791	light responsive
SiLBD4	G-box	CACGTG	1822	1828	light responsive
SiLBD4	G-box	GCCACGTGGA	1850	1859	light responsive
SiLBD4	G-Box	CACGTG	1293	1299	light responsive
SiLBD4	G-Box	CACGTG	1785	1791	light responsive
SiLBD4	G-Box	CACGTG	1822	1828	light responsive
SiLBD4	motif I	gGTACGTGGCG	1090	1100	root specific
SiLBD4	GATA-motif	AAGGATAAGG	640	649	light responsive
SiLBD4	AE-box	AGAAACAA	1657	1665	light responsive
SiLBD4	GC-motif	CCCCCG	775	781	anoxic specific inducibility
SiLBD4	GC-motif	CCCCCG	879	885	anoxic specific inducibility
SiLBD4	GC-motif	CCCCCG	1205	1211	anoxic specific inducibility
SiLBD4	GC-motif	CCCCCG	1942	1948	anoxic specific inducibility
SiLBD4	TGA-element	AACGAC	329	335	auxin responsive
SiLBD4	TGA-element	AACGAC	865	871	auxin responsive
SiLBD4	TGA-element	AACGAC	1184	1190	auxin responsive
SiLBD4	CGTCA-motif	CGTCA	809	814	MeJA responsive
SiLBD4	CGTCA-motif	CGTCA	1012	1017	MeJA responsive
SiLBD4	CGTCA-motif	CGTCA	1299	1304	MeJA responsive
SiLBD4	ABRE	ACGTG	1188	1193	abscisic acid responsive
SiLBD4	ABRE	CACGTG	1293	1299	abscisic acid responsive
SiLBD4	ABRE	ACGTG	1294	1299	abscisic acid responsive
SiLBD4	ABRE	ACGTG	1301	1306	abscisic acid responsive
SiLBD4	ABRE	CACGTG	1785	1791	abscisic acid responsive
SiLBD4	ABRE	ACGTG	1786	1791	abscisic acid responsive
SiLBD4	ABRE	CACGTG	1822	1828	abscisic acid responsive
SiLBD4	ABRE	ACGTG	1823	1828	abscisic acid responsive
SiLBD4	Sp1	GGGCGG	130	136	light responsive
SiLBD4	Sp1	GGGCGG	798	804	light responsive
SiLBD4	Sp1	GGGCGG	986	992	light responsive
SiLBD5	Sp1	GGGCGG	1337	1343	light responsive
SiLBD5	Sp1	GGGCGG	1430	1436	light responsive
SiLBD5	Sp1	GGGCGG	1452	1458	light responsive
SiLBD5	Sp1	GGGCGG	1510	1516	light responsive
SiLBD5	Sp1	GGGCGG	1835	1841	light responsive
SiLBD5	Sp1	GGGCGG	1957	1963	light responsive
SiLBD5	ABRE	ACGTG	510	515	abscisic acid responsive
SiLBD5	ABRE	TACGGTC	1027	1034	abscisic acid responsive
SiLBD5	ABRE	ACGTG	1317	1322	abscisic acid responsive
SiLBD5	ABRE	ACGTG	1874	1879	abscisic acid responsive
SiLBD5	CGTCA-motif	CGTCA	303	308	MeJA responsive
SiLBD5	CGTCA-motif	CGTCA	508	513	MeJA responsive
SiLBD5	CGTCA-motif	CGTCA	1010	1015	MeJA responsive
SiLBD5	GC-motif	CCCCCG	393	399	anoxic specific inducibility
SiLBD5	GC-motif	CCCCCG	518	524	anoxic specific inducibility
SiLBD5	GC-motif	CCCCCG	1514	1520	anoxic specific inducibility
SiLBD5	Box 4	ATTAAT	666	672	light responsive
SiLBD5	Box 4	ATTAAT	781	787	light responsive
SiLBD5	RY-element	CATGCATG	1627	1635	seed specific regulation
SiLBD5	G-box	CACGTC	509	515	light responsive
SiLBD5	G-box	TACGTG	1316	1322	light responsive
SiLBD5	G-box	TACGTG	1874	1880	light responsive
SiLBD5	CAT-box	GCCACT	1385	1391	meristem expression
SiLBD5	MRE	AACCTAA	604	611	light responsive
SiLBD5	TCCC-motif	TCTCCCT	986	993	light responsive
SiLBD5	AuxRR-core	GGTCCAT	731	738	auxin responsive
SiLBD5	TATA-box	TATA	1966	1970	core promoter element of transcription start
SiLBD5	TATA-box	TATA	1085	1089	core promoter element of transcription start
SiLBD5	TATA-box	TATATA	1964	1970	core promoter element of transcription start
SiLBD5	TATA-box	TATA	827	831	core promoter element of transcription start
SiLBD5	TATA-box	TATAA	671	676	core promoter element of transcription start
SiLBD5	TATA-box	TATAAAA	836	843	core promoter element of transcription start
SiLBD5	TATA-box	TATAAA	837	843	core promoter element of transcription start
SiLBD5	TATA-box	TATATAA	1963	1970	core promoter element of transcription start
SiLBD5	TATA-box	TATA	1048	1052	core promoter element of transcription start
SiLBD5	TATA-box	TATA	916	920	core promoter element of transcription start
SiLBD5	TATA-box	TATA	672	676	core promoter element of transcription start
SiLBD5	TATA-box	TATA	661	665	core promoter element of transcription start
SiLBD5	TATA-box	ccTATAAAaa	1083	1092	core promoter element of transcription start
SiLBD5	TATA-box	TATA	839	843	core promoter element of transcription start
SiLBD5	TATA-box	ATATAT	1047	1053	core promoter element of transcription start
SiLBD5	TATA-box	TATACA	825	831	core promoter element of transcription start
SiLBD5	TATA-box	ATATAA	660	666	core promoter element of transcription start
SiLBD5	TATA-box	TATAA	838	843	core promoter element of transcription start
SiLBD5	TATA-box	ATTATA	670	676	core promoter element of transcription start
SiLBD5	TGACG-motif	TGACG	303	308	MeJA responsive
SiLBD5	TGACG-motif	TGACG	508	513	MeJA responsive
SiLBD5	TGACG-motif	TGACG	1010	1015	MeJA responsive
SiLBD5	GT1-motif	GGTTAAT	812	819	light responsive
SiLBD5	GT1-motif	GGTTAA	813	819	light responsive
SiLBD5	GT1-motif	GGTTAA	1060	1066	light responsive
SiLBD5	LTR	CCGAAA	493	499	low-temperature responsive
SiLBD5	LTR	CCGAAA	973	979	low-temperature responsive
SiLBD5	LTR	CCGAAA	1056	1062	low-temperature responsive
SiLBD5	LTR	CCGAAA	1187	1193	low-temperature responsive
SiLBD6	Sp1	GGGCGG	741	747	light responsive
SiLBD6	Sp1	GGGCGG	763	769	light responsive
SiLBD6	Sp1	GGGCGG	767	773	light responsive
SiLBD6	Sp1	GGGCGG	910	916	light responsive
SiLBD6	ABRE	CACGTG	19	25	abscisic acid responsive
SiLBD6	ABRE	ACGTG	20	25	abscisic acid responsive
SiLBD6	ABRE	ACGTG	170	175	abscisic acid responsive
SiLBD6	ABRE	CACGTG	195	201	abscisic acid responsive
SiLBD6	ABRE	ACGTG	196	201	abscisic acid responsive
SiLBD6	CGTCA-motif	CGTCA	548	553	MeJA responsive
SiLBD6	CGTCA-motif	CGTCA	718	723	MeJA responsive
SiLBD6	CGTCA-motif	CGTCA	1674	1679	MeJA responsive
SiLBD6	CGTCA-motif	CGTCA	1694	1699	MeJA responsive
SiLBD6	TATC-box	TATCCCA	1569	1576	gibberellin responsive
SiLBD6	GCN4_motif	TGAGTCA	1883	1890	endosperm expression
SiLBD6	AE-box	AGAAACTT	1602	1610	light responsive
SiLBD6	Box 4	ATTAAT	1448	1454	light responsive
SiLBD6	G-box	CACGTG	19	25	light responsive
SiLBD6	G-box	TAAACGTG	170	178	light responsive
SiLBD6	G-box	CACGTG	195	201	light responsive
SiLBD6	O2-site	GTTGACGTGA	1117	1126	zein metabolism regulation
SiLBD6	ARE	AAACCA	43	49	meristem expression
SiLBD6	ARE	AAACCA	61	67	meristem expression
SiLBD6	ARE	AAACCA	636	642	meristem expression
SiLBD6	G-Box	CACGTG	19	25	light responsive
SiLBD6	G-Box	CACGTT	170	176	light responsive
SiLBD6	G-Box	CACGTG	195	201	light responsive
SiLBD6	MRE	AACCTAA	1706	1713	light responsive
SiLBD6	TATA-box	TATA	1250	1254	core promoter element of transcription start
SiLBD6	TATA-box	taTATAAAtc	1244	1253	core promoter element of transcription start
SiLBD6	TATA-box	TATA	1564	1568	core promoter element of transcription start
SiLBD6	TATA-box	TATACA	1537	1543	core promoter element of transcription start
SiLBD6	TATA-box	TATA	1469	1473	core promoter element of transcription start
SiLBD6	TATA-box	ATATAT	1079	1085	core promoter element of transcription start
SiLBD6	TATA-box	TATA	965	969	core promoter element of transcription start
SiLBD6	TATA-box	TATAA	282	287	core promoter element of transcription start
SiLBD6	TATA-box	TATAA	1069	1074	core promoter element of transcription start
SiLBD6	TATA-box	TATAA	148	153	core promoter element of transcription start
SiLBD6	TATA-box	ATATAA	1625	1631	core promoter element of transcription start
SiLBD6	TATA-box	ATATAT	1563	1569	core promoter element of transcription start
SiLBD6	TATA-box	ATATAT	1956	1962	core promoter element of transcription start
SiLBD6	TATA-box	TATA	1206	1210	core promoter element of transcription start
SiLBD6	TATA-box	TATA	397	401	core promoter element of transcription start
SiLBD6	TATA-box	TATA	1541	1545	core promoter element of transcription start
SiLBD6	TATA-box	TATAAA	916	922	core promoter element of transcription start
SiLBD6	TATA-box	TATA	214	218	core promoter element of transcription start
SiLBD6	TATA-box	TATATA	1957	1963	core promoter element of transcription start
SiLBD6	TATA-box	TATATA	1955	1961	core promoter element of transcription start
SiLBD6	TATA-box	TATAAA	1246	1252	core promoter element of transcription start
SiLBD6	TATA-box	TATA	149	153	core promoter element of transcription start
SiLBD6	TATA-box	ATTATA	212	218	core promoter element of transcription start
SiLBD6	TATA-box	TATA	1082	1086	core promoter element of transcription start
SiLBD6	TATA-box	TATAAAT	1245	1252	core promoter element of transcription start
SiLBD6	TATA-box	TATA	1070	1074	core promoter element of transcription start
SiLBD6	TATA-box	TATAA	213	218	core promoter element of transcription start
SiLBD6	TATA-box	ATTATA	1053	1059	core promoter element of transcription start
SiLBD6	TATA-box	TATAA	1468	1473	core promoter element of transcription start
SiLBD6	TATA-box	TATA	186	190	core promoter element of transcription start
SiLBD6	TATA-box	TACAAAA	1182	1189	core promoter element of transcription start
SiLBD6	TATA-box	ATTATA	147	153	core promoter element of transcription start
SiLBD6	TATA-box	TATATA	1539	1545	core promoter element of transcription start
SiLBD6	TATA-box	TATA	96	100	core promoter element of transcription start
SiLBD6	TATA-box	TATAAAA	1203	1210	core promoter element of transcription start
SiLBD6	TATA-box	TATAA	95	100	core promoter element of transcription start
SiLBD6	TATA-box	ATATAA	1249	1255	core promoter element of transcription start
SiLBD6	TATA-box	TATAA	1205	1210	core promoter element of transcription start
SiLBD6	TATA-box	TATA	918	922	core promoter element of transcription start
SiLBD6	TATA-box	TATAA	1128	1133	core promoter element of transcription start
SiLBD6	TATA-box	TATATA	1248	1254	core promoter element of transcription start
SiLBD6	TATA-box	TATAA	917	922	core promoter element of transcription start
SiLBD6	TATA-box	TATATAA	1247	1254	core promoter element of transcription start
SiLBD6	TATA-box	TATAAA	1204	1210	core promoter element of transcription start
SiLBD6	TATA-box	TATA	1152	1156	core promoter element of transcription start
SiLBD6	TATA-box	TATA	1047	1051	core promoter element of transcription start
SiLBD6	TATA-box	TATATA	1045	1051	core promoter element of transcription start
SiLBD6	TATA-box	TATA	1959	1963	core promoter element of transcription start
SiLBD6	TATA-box	ATATAT	1044	1050	core promoter element of transcription start
SiLBD6	TATA-box	TATA	1129	1133	core promoter element of transcription start
SiLBD6	TATA-box	TATAA	1054	1059	core promoter element of transcription start
SiLBD6	TATA-box	ATTATA	1068	1074	core promoter element of transcription start
SiLBD6	TATA-box	TATA	1055	1059	core promoter element of transcription start
SiLBD6	TATA-box	TATATA	1080	1086	core promoter element of transcription start
SiLBD6	TATA-box	TATA	1626	1630	core promoter element of transcription start
SiLBD6	TATA-box	TATA	283	287	core promoter element of transcription start
SiLBD6	TATA-box	ATTATA	94	100	core promoter element of transcription start
SiLBD6	TATA-box	ATATAT	1771	1777	core promoter element of transcription start
SiLBD6	TATA-box	ATATAT	1081	1087	core promoter element of transcription start
SiLBD6	TATA-box	ATTATA	281	287	core promoter element of transcription start
SiLBD6	TATA-box	TATA	1772	1776	core promoter element of transcription start
SiLBD6	TATA-box	TATA	421	425	core promoter element of transcription start
SiLBD6	TATA-box	ATATAA	396	402	core promoter element of transcription start
SiLBD6	TGACG-motif	TGACG	548	553	MeJA responsive
SiLBD6	TGACG-motif	TGACG	718	723	MeJA responsive
SiLBD6	TGACG-motif	TGACG	1674	1679	MeJA responsive
SiLBD6	TGACG-motif	TGACG	1694	1699	MeJA responsive
SiLBD6	TCCC-motif	TCTCCCT	1991	1998	light responsive
SiLBD6	I-box	AGATAAGG	839	847	light responsive
SiLBD6	GT1-motif	GGTTAA	133	139	light responsive
SiLBD6	GT1-motif	GGTTAA	1610	1616	light responsive
SiLBD6	MBS	CAACTG	1938	1944	drought inducibility
SiLBD7	ABRE	ACGTG	273	278	abscisic acid responsive
SiLBD7	ABRE	ACGTG	693	698	abscisic acid responsive
SiLBD7	ABRE	ACGTG	1913	1918	abscisic acid responsive
SiLBD7	Sp1	GGGCGG	451	457	light responsive
SiLBD7	Sp1	GGGCGG	706	712	light responsive
SiLBD7	Sp1	GGGCGG	711	717	light responsive
SiLBD7	Sp1	GGGCGG	1987	1993	light responsive
SiLBD7	Sp1	GGGCGG	1991	1997	light responsive
SiLBD7	CGTCA-motif	CGTCA	138	143	MeJA responsive
SiLBD7	CGTCA-motif	CGTCA	470	475	MeJA responsive
SiLBD7	CGTCA-motif	CGTCA	1722	1727	MeJA responsive
SiLBD7	CGTCA-motif	CGTCA	1911	1916	MeJA responsive
SiLBD7	GATT-motif	CTCCTGATTAGC	1360	1371	light responsive
SiLBD7	TGA-element	AACGAC	241	247	auxin responsive
SiLBD7	TGA-element	AACGAC	408	414	auxin responsive
SiLBD7	GC-motif	CCCCCG	714	720	anoxic specific inducibility
SiLBD7	P-box	CCTTTTG	1450	1457	gibberellin responsive
SiLBD7	Box 4	ATTAAT	924	930	light responsive
SiLBD7	Box 4	ATTAAT	1287	1293	light responsive
SiLBD7	Box 4	ATTAAT	1318	1324	light responsive
SiLBD7	Box 4	ATTAAT	1326	1332	light responsive
SiLBD7	AE-box	AGAAACAA	1757	1765	light responsive
SiLBD7	RY-element	CATGCATG	146	154	seed specific regulation
SiLBD7	ATCT-motif	AATCTAATCC	1006	1015	light responsive
SiLBD7	motif I	gGTACGTGGCG	690	701	root specific
SiLBD7	ARE	AAACCA	318	324	meristem expression
SiLBD7	ARE	AAACCA	343	349	meristem expression
SiLBD7	ARE	AAACCA	349	355	meristem expression
SiLBD7	ARE	AAACCA	359	365	meristem expression
SiLBD7	ARE	AAACCA	496	502	meristem expression
SiLBD7	ARE	AAACCA	507	513	meristem expression
SiLBD7	ARE	AAACCA	533	539	meristem expression
SiLBD7	ARE	AAACCA	1830	1836	meristem expression
SiLBD7	G-Box	CACGTT	272	278	light responsive
SiLBD7	CAT-box	GCCACT	474	480	meristem expression
SiLBD7	G-box	TACGTG	692	698	light responsive
SiLBD7	G-box	CACGTC	1912	1918	light responsive
SiLBD7	O2-site	GATGACATGG	129	138	zein metabolism regulation
SiLBD7	O2-site	GATGATGTGG	291	300	zein metabolism regulation
SiLBD7	MRE	AACCTAA	1228	1235	light responsive
SiLBD7	AuxRR-core	GGTCCAT	171	178	auxin responsive
SiLBD7	ACE	GCGACGTACC	690	699	light responsive
SiLBD7	TATA-box	TATA	1685	1689	core promoter element of transcription start
SiLBD7	TATA-box	TATAA	1337	1342	core promoter element of transcription start
SiLBD7	TATA-box	TATAAAA	1335	1342	core promoter element of transcription start
SiLBD7	TATA-box	TACAAAA	1197	1204	core promoter element of transcription start
SiLBD7	TATA-box	TATAAA	1336	1342	core promoter element of transcription start
SiLBD7	TATA-box	TATA	901	905	core promoter element of transcription start
SiLBD7	TATA-box	TATA	879	883	core promoter element of transcription start
SiLBD7	TATA-box	TATAA	878	883	core promoter element of transcription start
SiLBD7	TATA-box	TATA	1338	1342	core promoter element of transcription start
SiLBD7	TATA-box	ATTATA	1044	1050	core promoter element of transcription start
SiLBD7	TATA-box	TACAAAA	1032	1039	core promoter element of transcription start
SiLBD7	TATA-box	ATTATA	877	883	core promoter element of transcription start
SiLBD7	TATA-box	TATA	1186	1190	core promoter element of transcription start
SiLBD7	TATA-box	TATAA	1045	1050	core promoter element of transcription start
SiLBD7	TATA-box	TATA	1046	1050	core promoter element of transcription start
SiLBD7	TGACG-motif	TGACG	138	143	MeJA responsive
SiLBD7	TGACG-motif	TGACG	470	475	MeJA responsive
SiLBD7	TGACG-motif	TGACG	1722	1727	MeJA responsive
SiLBD7	TGACG-motif	TGACG	1911	1916	MeJA responsive
SiLBD7	LTR	CCGAAA	1588	1594	low-temperature responsive
SiLBD8	O2-site	GATGA(C/T)(A/G)TG(A/G)	1739	1747	zein metabolism regulation
SiLBD8	G-box	TAACACGTAG	84	93	light responsive
SiLBD8	G-box	CACGTC	101	107	light responsive
SiLBD8	G-box	TACGTG	153	159	light responsive
SiLBD8	G-box	TACGTG	1703	1709	light responsive
SiLBD8	CAT-box	GCCACT	264	270	meristem expression
SiLBD8	G-Box	CACGTT	350	356	light responsive
SiLBD8	G-Box	TCCACATGGCA	952	962	light responsive
SiLBD8	ARE	AAACCA	332	338	meristem expression
SiLBD8	ARE	AAACCA	573	579	meristem expression
SiLBD8	MRE	AACCTAA	1627	1634	light responsive
SiLBD8	TGACG-motif	TGACG	100	105	MeJA responsive
SiLBD8	MBS	CAACTG	147	153	drought inducibility
SiLBD8	MBS	CAACTG	198	204	drought inducibility
SiLBD8	GT1-motif	GGTTAA	1924	1930	light responsive
SiLBD8	ABRE	ACGTG	102	107	abscisic acid responsive
SiLBD8	ABRE	ACGTG	154	159	abscisic acid responsive
SiLBD8	ABRE	ACGTG	351	356	abscisic acid responsive
SiLBD8	ABRE	ACGTG	1703	1708	abscisic acid responsive
SiLBD8	Sp1	GGGCGG	42	48	light responsive
SiLBD8	CGTCA-motif	CGTCA	100	105	MeJA responsive
SiLBD8	TATA-box	TATA	1786	1790	core promoter element of transcription start
SiLBD8	TATA-box	TATATTTATATTT	1362	1374	core promoter element of transcription start
SiLBD8	TATA-box	TATA	943	947	core promoter element of transcription start
SiLBD8	TATA-box	TATA	444	448	core promoter element of transcription start
SiLBD8	TATA-box	ATATAA	942	948	core promoter element of transcription start
SiLBD8	TATA-box	TATATAA	1783	1790	core promoter element of transcription start
SiLBD8	TATA-box	ATTATA	322	328	core promoter element of transcription start
SiLBD8	TATA-box	TATA	930	934	core promoter element of transcription start
SiLBD8	TATA-box	TATACA	911	917	core promoter element of transcription start
SiLBD8	TATA-box	TATA	913	917	core promoter element of transcription start
SiLBD8	TATA-box	TATA	1234	1238	core promoter element of transcription start
SiLBD8	TATA-box	ATATAA	1233	1239	core promoter element of transcription start
SiLBD8	TATA-box	TATAAAA	1343	1350	core promoter element of transcription start
SiLBD8	TATA-box	ATATAT	498	504	core promoter element of transcription start
SiLBD8	TATA-box	TATA	326	330	core promoter element of transcription start
SiLBD8	TATA-box	TATA	1011	1015	core promoter element of transcription start
SiLBD8	TATA-box	TATA	318	322	core promoter element of transcription start
SiLBD8	TATA-box	TATA	907	911	core promoter element of transcription start
SiLBD8	TATA-box	TATAA	1010	1015	core promoter element of transcription start
SiLBD8	TATA-box	ATATAA	456	462	core promoter element of transcription start
SiLBD8	TATA-box	TATATA	442	448	core promoter element of transcription start
SiLBD8	TATA-box	TATA	756	760	core promoter element of transcription start
SiLBD8	TATA-box	TATA	1805	1809	core promoter element of transcription start
SiLBD8	TATA-box	ATATAT	443	449	core promoter element of transcription start
SiLBD8	TATA-box	TATAA	1345	1350	core promoter element of transcription start
SiLBD8	TATA-box	TATA	499	503	core promoter element of transcription start
SiLBD8	TATA-box	TATA	423	427	core promoter element of transcription start
SiLBD8	TATA-box	TATA	362	366	core promoter element of transcription start
SiLBD8	TATA-box	ATATAA	317	323	core promoter element of transcription start
SiLBD8	TATA-box	TATATA	324	330	core promoter element of transcription start
SiLBD8	TATA-box	TATATA	1784	1790	core promoter element of transcription start
SiLBD8	TATA-box	ATATAT	906	912	core promoter element of transcription start
SiLBD8	TATA-box	TATA	1060	1064	core promoter element of transcription start
SiLBD8	TATA-box	ATTATA	1009	1015	core promoter element of transcription start
SiLBD8	TATA-box	TATA	1605	1609	core promoter element of transcription start
SiLBD8	TATA-box	ATTATA	1782	1788	core promoter element of transcription start
SiLBD8	TATA-box	TATA	1248	1252	core promoter element of transcription start
SiLBD8	TATA-box	TATATAA	323	330	core promoter element of transcription start
SiLBD8	TATA-box	TATA	457	461	core promoter element of transcription start
SiLBD8	TATA-box	TATAAA	1344	1350	core promoter element of transcription start
SiLBD8	TATA-box	ATTATA	1803	1809	core promoter element of transcription start
SiLBD8	TATA-box	TATAA	755	760	core promoter element of transcription start
SiLBD8	TATA-box	ATATAT	1361	1367	core promoter element of transcription start
SiLBD8	TATA-box	TATA	1346	1350	core promoter element of transcription start
SiLBD8	TATA-box	ATTATA	1246	1252	core promoter element of transcription start
SiLBD8	TATA-box	TATAA	1247	1252	core promoter element of transcription start
SiLBD8	TATA-box	TATAA	1804	1809	core promoter element of transcription start
SiLBD8	TC-rich repeats	ATTCTCTAAC	582	591	defense and stress responsive
SiLBD8	TCT-motif	TCTTAC	586	592	light responsive
SiLBD8	P-box	CCTTTTG	1728	1735	gibberellin responsive
SiLBD8	HD-Zip 1	CAAT(A/T)ATTG	297	305	differentiation of the palisade mesophyll cells
SiLBD8	RY-element	CATGCATG	190	198	seed specific regulation
SiLBD8	GATA-motif	GATAGGA	1752	1759	light responsive
SiLBD8	AE-box	AGAAACTT	1179	1187	light responsive
SiLBD8	GA-motif	ATAGATAA	424	432	light responsive
SiLBD8	Box 4	ATTAAT	487	493	light responsive
SiLBD8	Box 4	ATTAAT	671	677	light responsive
SiLBD8	Box 4	ATTAAT	1799	1805	light responsive
SiLBD9	AuxRR-core	GGTCCAT	8	15	auxin responsive
SiLBD9	TATA-box	TATA	58	62	core promoter element of transcription start
SiLBD9	TATA-box	TATAAA	1075	1081	core promoter element of transcription start
SiLBD9	TATA-box	TATA	1957	1961	core promoter element of transcription start
SiLBD9	TATA-box	TATAAAA	1074	1081	core promoter element of transcription start
SiLBD9	TATA-box	TATA	1054	1058	core promoter element of transcription start
SiLBD9	TATA-box	TATAA	1076	1081	core promoter element of transcription start
SiLBD9	TATA-box	TATA	1007	1011	core promoter element of transcription start
SiLBD9	TATA-box	ATATAA	1053	1059	core promoter element of transcription start
SiLBD9	TATA-box	TATA	746	750	core promoter element of transcription start
SiLBD9	TATA-box	TATAA	745	750	core promoter element of transcription start
SiLBD9	TATA-box	TATATA	56	62	core promoter element of transcription start
SiLBD9	TATA-box	TATA	1282	1286	core promoter element of transcription start
SiLBD9	TATA-box	TATA	641	645	core promoter element of transcription start
SiLBD9	TATA-box	ccTATAAAaa	1073	1082	core promoter element of transcription start
SiLBD9	TATA-box	ATATAT	57	63	core promoter element of transcription start
SiLBD9	TATA-box	ATATAT	55	61	core promoter element of transcription start
SiLBD9	TATA-box	ATATAT	607	613	core promoter element of transcription start
SiLBD9	TATA-box	TATACA	1005	1011	core promoter element of transcription start
SiLBD9	TATA-box	TATA	608	612	core promoter element of transcription start
SiLBD9	TATA-box	TATAA	1956	1961	core promoter element of transcription start
SiLBD9	TATA-box	TATA	1077	1081	core promoter element of transcription start
SiLBD9	TCCC-motif	TCTCCCT	1903	1910	light responsive
SiLBD9	TGACG-motif	TGACG	1450	1455	MeJA responsive
SiLBD9	LTR	CCGAAA	790	796	low-temperature responsive
SiLBD9	GT1-motif	GGTTAA	325	331	light responsive
SiLBD9	GT1-motif	GGTTAA	327	333	light responsive
SiLBD9	GT1-motif	GGTTAA	1713	1719	light responsive
SiLBD9	GT1-motif	GGTTAA	1765	1771	light responsive
SiLBD9	G-Box	CACGTT	27	33	light responsive
SiLBD9	ARE	AAACCA	100	106	meristem expression
SiLBD9	ARE	AAACCA	1485	1491	meristem expression
SiLBD9	O2-site	GATGACATGG	1461	1470	zein metabolism regulation
SiLBD9	O2-site	GATGACATGG	1595	1604	zein metabolism regulation
SiLBD9	G-box	TACGTG	1411	1417	light responsive
SiLBD9	G-box	CACGAC	1631	1637	light responsive
SiLBD9	CAT-box	GCCACT	1178	1184	meristem expression
SiLBD9	CAT-box	GCCACT	1858	1864	meristem expression
SiLBD9	ATC-motif	AGTAATCT	41	49	light responsive
SiLBD9	TCT-motif	TCTTAC	33	39	light responsive
SiLBD9	TCT-motif	TCTTAC	723	729	light responsive
SiLBD9	P-box	CCTTTTG	1377	1384	gibberellin responsive
SiLBD9	RY-element	CATGCATG	1777	1785	seed specific regulation
SiLBD9	RY-element	CATGCATG	1781	1789	seed specific regulation
SiLBD9	ABRE	ACGTG	27	32	abscisic acid responsive
SiLBD9	ABRE	CGTACGTGCA	1409	1418	abscisic acid responsive
SiLBD9	ABRE	ACGTG	1411	1416	abscisic acid responsive
SiLBD9	ABRE	GCCGCGTGGC	1434	1443	abscisic acid responsive
SiLBD9	ABRE	CGTACGTGCA	1649	1658	abscisic acid responsive
SiLBD9	ABRE	CGCACGTGTC	1876	1885	abscisic acid responsive
SiLBD9	ABRE	GCCGCGTGGC	1935	1944	abscisic acid responsive
SiLBD9	Sp1	GGGCGG	1196	1202	light responsive
SiLBD9	CGTCA-motif	CGTCA	1450	1455	MeJA responsive

## Sheet: Table S6
Table S6. The primers for qRT-PCR in this study
Gene ID	Gene name	Forward（5'-3'）	Reverse (5'-3')
Seita.2G186800	SiLBD4	GCGCAAGTGCAACCCGAA	TCTGTTTGGTCGATCTGCCTC
Seita.2G373900	SiLBD5	GACCTCGGGCTGTGTCTCA	AAAGGTTCAGCAGCTCGGG
Seita.3G045800	SiLBD6	AGCCCCACAAGTTCGCTAC	CTTGAGGTCGTTCACCTGCC
Seita.3G120000	SiLBD7	GTCTTCCGCTCTCTGCTCTAC	ACGTGTCGGATGTCGTAGC
Seita.3G240500	SiLBD8	ACTTCATCAACGTCGGCCAT	GATGAGTACGCGAAGCCGTA
Seita.3G280000	SiLBD9	GACGTGGATGCGTTCCTGAT	CACAGGGATTCCCGCTTGAG
Seita.4G047700	SiLBD10	GGCGGCTTACCATTCCTGAT	GCAATGTTCTCGTTGTCGGG
Seita.5G002200	SiLBD11	TCCAGCACCACCAACAACAT	TTGCTGCTCTTGTTGTCCCT
Seita.5G088000	SiLBD12	AGACCGATAGCAACACCTCG	AGAAGACTAGCTCGATGCCG
Seita.5G119400	SiLBD13	ATGGCTAATTGGGCCGTGAA	CTGTCTCCCCCTTCCTTGTG
Seita.5G334600	SiLBD15	CTCTCACAGGCGGTGGATTT	CCCCAAGACGTTATGCGAGA
Seita.5G364600	SiLBD16	CCGAGATCCTCAAGCACAGG	AACGTACACTGCCGACATCC
Seita.5G408700	SiLBD17	AACGGCGCTCACAACTTCA	GACTTCAAGAACGGGCTGATG
Seita.6G138500	SiLBD18	CCGACCATCGACATCAACCT	GCCGCCTTGATCTGGTAGTC
Seita.6G214900	SiLBD19	TCTCTTCCTCCACCTCCTCA	CGAGGTCAAGGAACTCGTCG
Seita.6G253100	SiLBD20	GTGTGTGAAGGGGTGTGTCT	GCAACGGTCACTTATCGGGA
Seita.7G273900	SiLBD21	ATGTCCACTGCAAGCGAATG	GCGAGAAGTAGGGCGAGAAG
Seita.7G331700	SiLBD22	TGCAAAATGGCCTGATGAACA	AGAGACTCTTTCTTGAGGCACG
Seita.8G019200	SiLBD23	GGAATGCGAGGCGTATGGTA	GGAACCTAAGCTGCCCATCA
Seita.9G149300	SiLBD25	CAACGTGCACAAGGTCTTCG	TGCACGATGTAGTCGTTGCT
Seita.9G168800	SiLBD26	ACTTATGATGAGGCAGGCCG	ACACTTCAGGATGCGACTGG
Seita.9G170000	SiLBD27	CTCATGTGGACGGGCAACT	GTTGTTCCTGCGCTTCTTGG
Seita.9G282200	SiLBD28	AACTCACCTACCTGCAAGGC	GGGTCCAAGAGGGTTGACAG
Seita.9G356100	SiLBD29	GATGGTCCACCTTCTCCACG	AAAAAGGTTGAGCAGCACCG
Seita.9G443300	SiLBD30	CTAGCACTCGTTTGCGTGGA	GTCCAGGTCCGAGTCGTAAA
Seita.9G470000	SiLBD31	ATCTTCGCGCCCTACTTCG	CTGGAGCAGCAGTTTGGAGA
Seita.9G539400	SiLBD32	CCCTACTTCTGCCACGAGC	CGAGGAGCTTGGACACGTT
Seita.9G539500	SiLBD33	CAGATGCAGGTGTTGCAGG	TCATCTCGTGTAGCTGCCTTC
Seita.9G115300	SiActin	TTGCTGACAGGATGAGCAAG	CACATCTGCTGGAATGTGCT

## Sheet: Table S7
Table S7. Primers used for cloning SiLBD21 and RT-PCR (PCR) assays.
The primers for clone SiLBD21	Gene ID	Primer names	Sequences
	Seita.7G273900	SiLBD21-NcoI-F (5'-3')	GGTGGT CCATGG ATGTCCACTGCAAGCGAAT
		SiLBD21-PmacI-R (5'-3')	GGTGGT CACGTG TCAACCAAAATAAGGAACAT
The primers of SiLBD21 transgenic lines for RT-PCR	Gene ID	Primer names	Sequences
	Seita.7G273900	SiLBD21-OEF (5'-3')	TCCAAGATGCTCCTGGAGGT
		SiLBD21-OER (5'-3')	GTACCTGTGCCTGACGATCT
	AT3G18780	AtActinF (5'-3')	CGCCATCCAAGCTGTTCTC
		AtActinR (5'-3')	TCACGTCCAGCAAGGTCAAG
	LOC_Os03g50885	OsActinF (5'-3')	AGCTGCGGGTATCCATGAGA
		OsActinR (5'-3')	GCAATGCCAGGGAACATAGTG
The primers of SiLBD21 transgenic lines for PCR	Gene ID	Primer names	Sequences
	Seita.7G273900	LBD21JDF (5'-3')	AGATCAAGAGGGAGTCAGCG
		LBD21JDR (5'-3')	CAGGTTCGCCTCGTACACC
